# Supplementary material for: Automated quality control and cell identification of droplet-based single-cell data using dropkick
Source: PubMed Central journal article supplement — Genome Res. 2021 Oct;31(10):1742–52. doi: 10.1101/gr.271908.120 (PMC8494217; doi:10.1101/gr.271908.120), 2021-10
Supplement: supp_gr.271908.120_Supplemental_Figures_Tables.pdf [file supp_gr.271908.120_Supplemental_Figures_Tables.pdf]

**SUPPLEMENTARY FIGURES, TABLES AND LEGENDS**

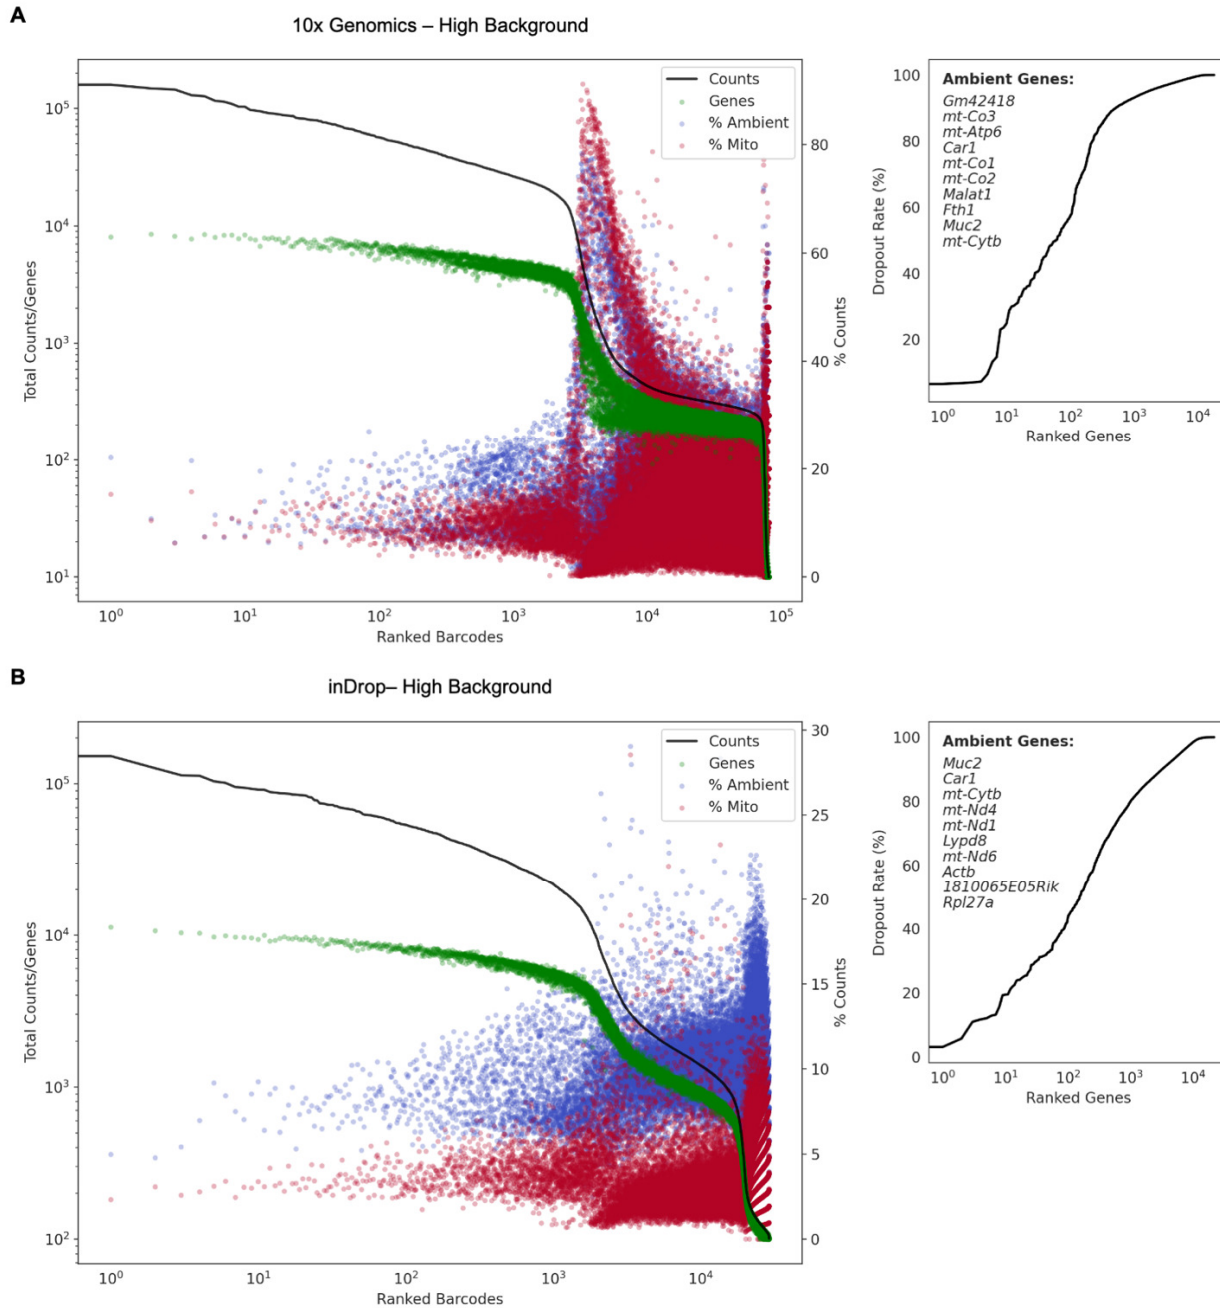

Supplementary Figure 1. dropkick QC reports for a mouse colonic epithelium sample analyzed by both 10x Genomics (A) and inDrop (B) scRNA-seq. In contrast to Figure 1, this is considered a high-background sample due to the height (increased total counts) of the second plateau (empty droplets) and presence of epithelial marker genes (*Car1*, *Muc2*) in the ambient profile.

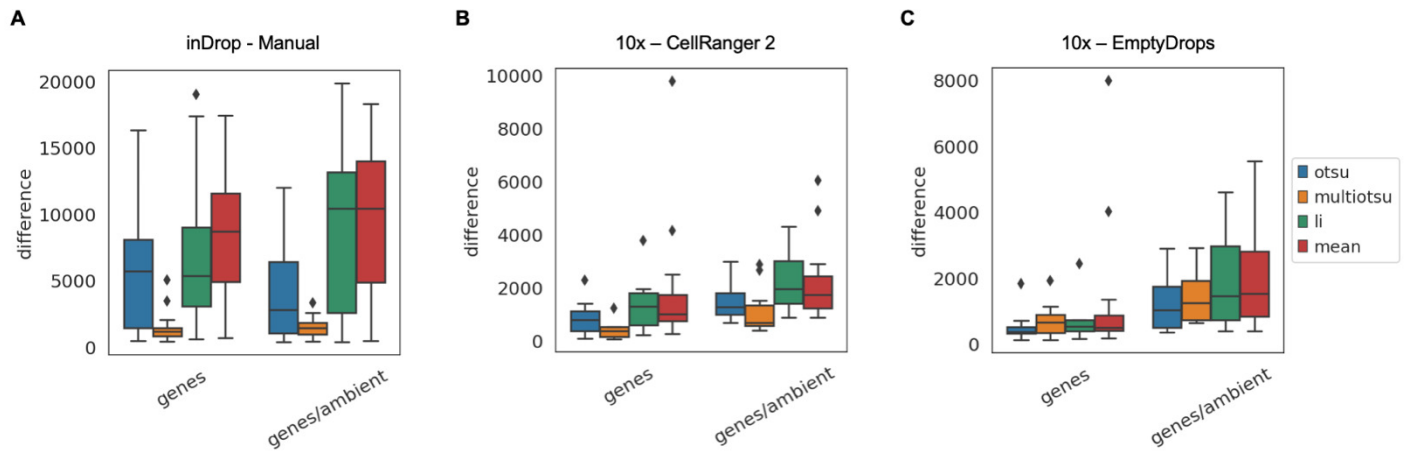

Supplementary Figure 2. Optimal heuristics and thresholding for determination of dropkick training set. A) Barcode set differences between initial dropkick thresholding and manual filtering of 33 inDrop scRNA-seq datasets. Four automated thresholding techniques were used to label cells based on the distribution of arcsinh-transformed genes detected alone (genes), or the combination of genes and percent ambient counts as calculated by the dropkick QC module (genes/ambient; see Methods: Quality control and ambient RNA quantification with dropkick QC module). B) Same as in A for 13 10x Genomics scRNA-seq datasets, with set differences compared to CellRanger\_2. C) Same as in B, with set differences compared to EmptyDrops.

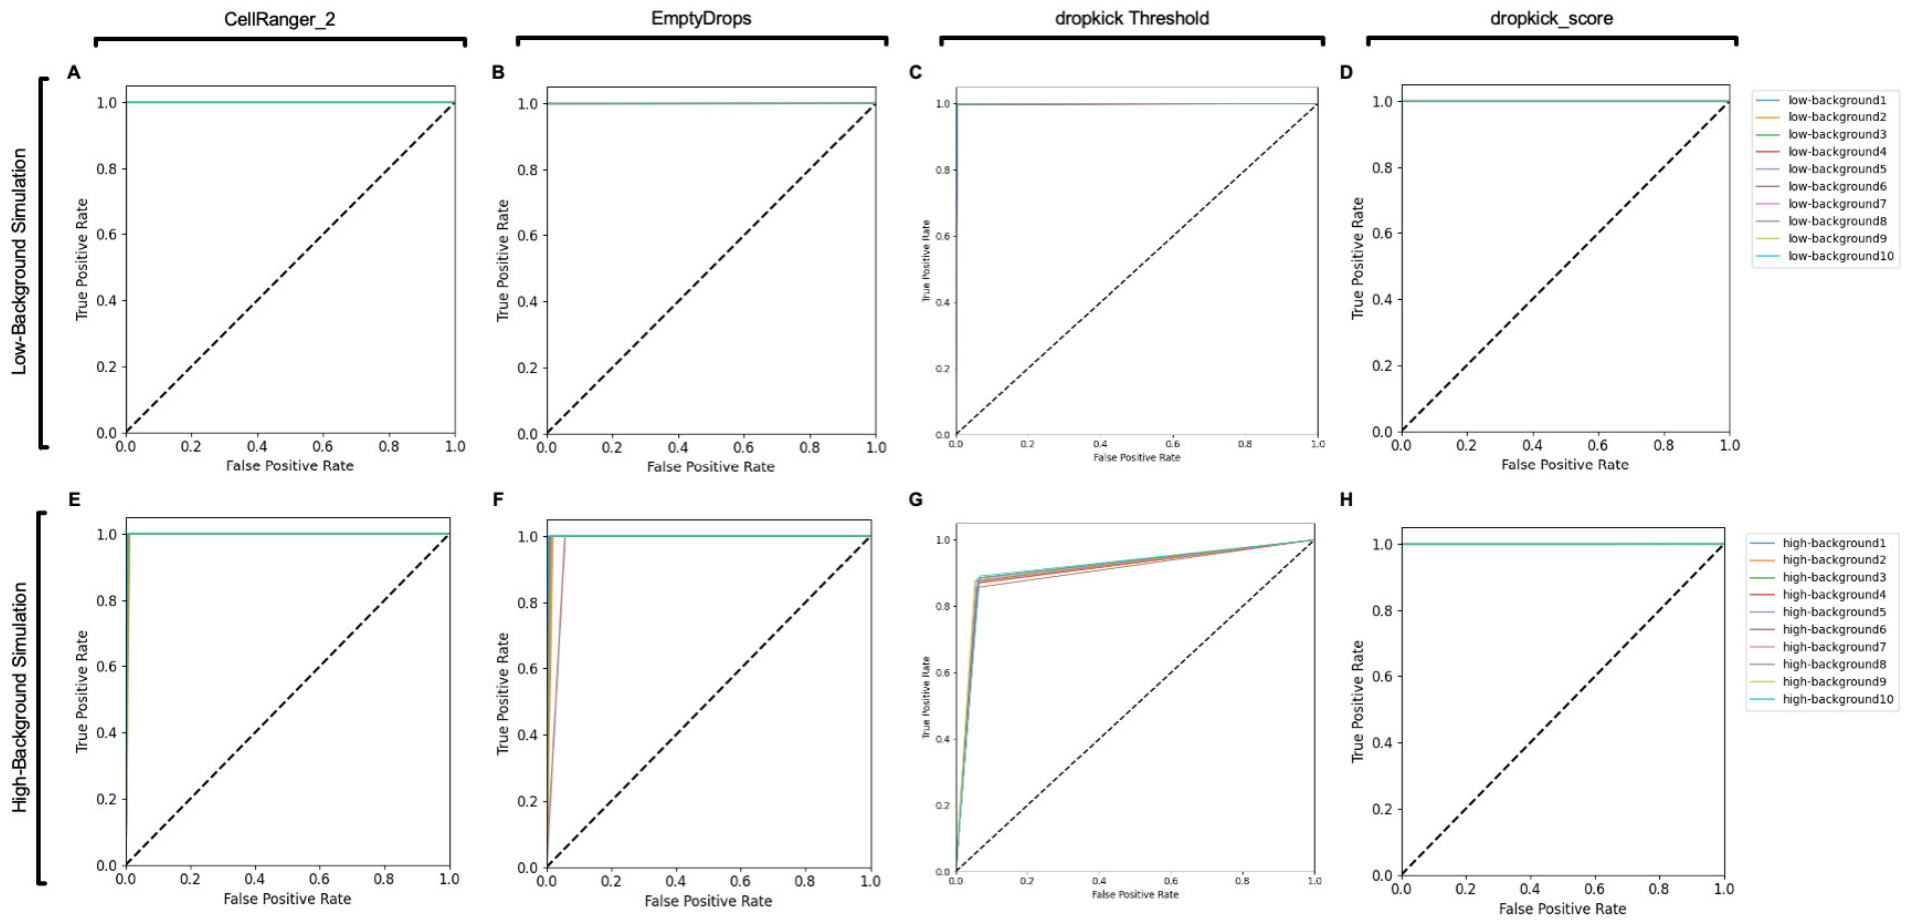

Supplementary Figure 3. Evaluating dropkick filtering performance with synthetic data. A) Receiver operating characteristic (ROC) curves for CellRanger\_2 vs. ground truth in ten low-background simulations. B) ROC curves for EmptyDrops vs. ground truth in ten low-background simulations. C) ROC curves for dropkick training labels (threshold) vs. ground truth in ten low-background simulations. D) ROC curves for final dropkick score vs. ground truth in ten low-background simulations. E-H) Same as in A-D, for ten high-background simulations.

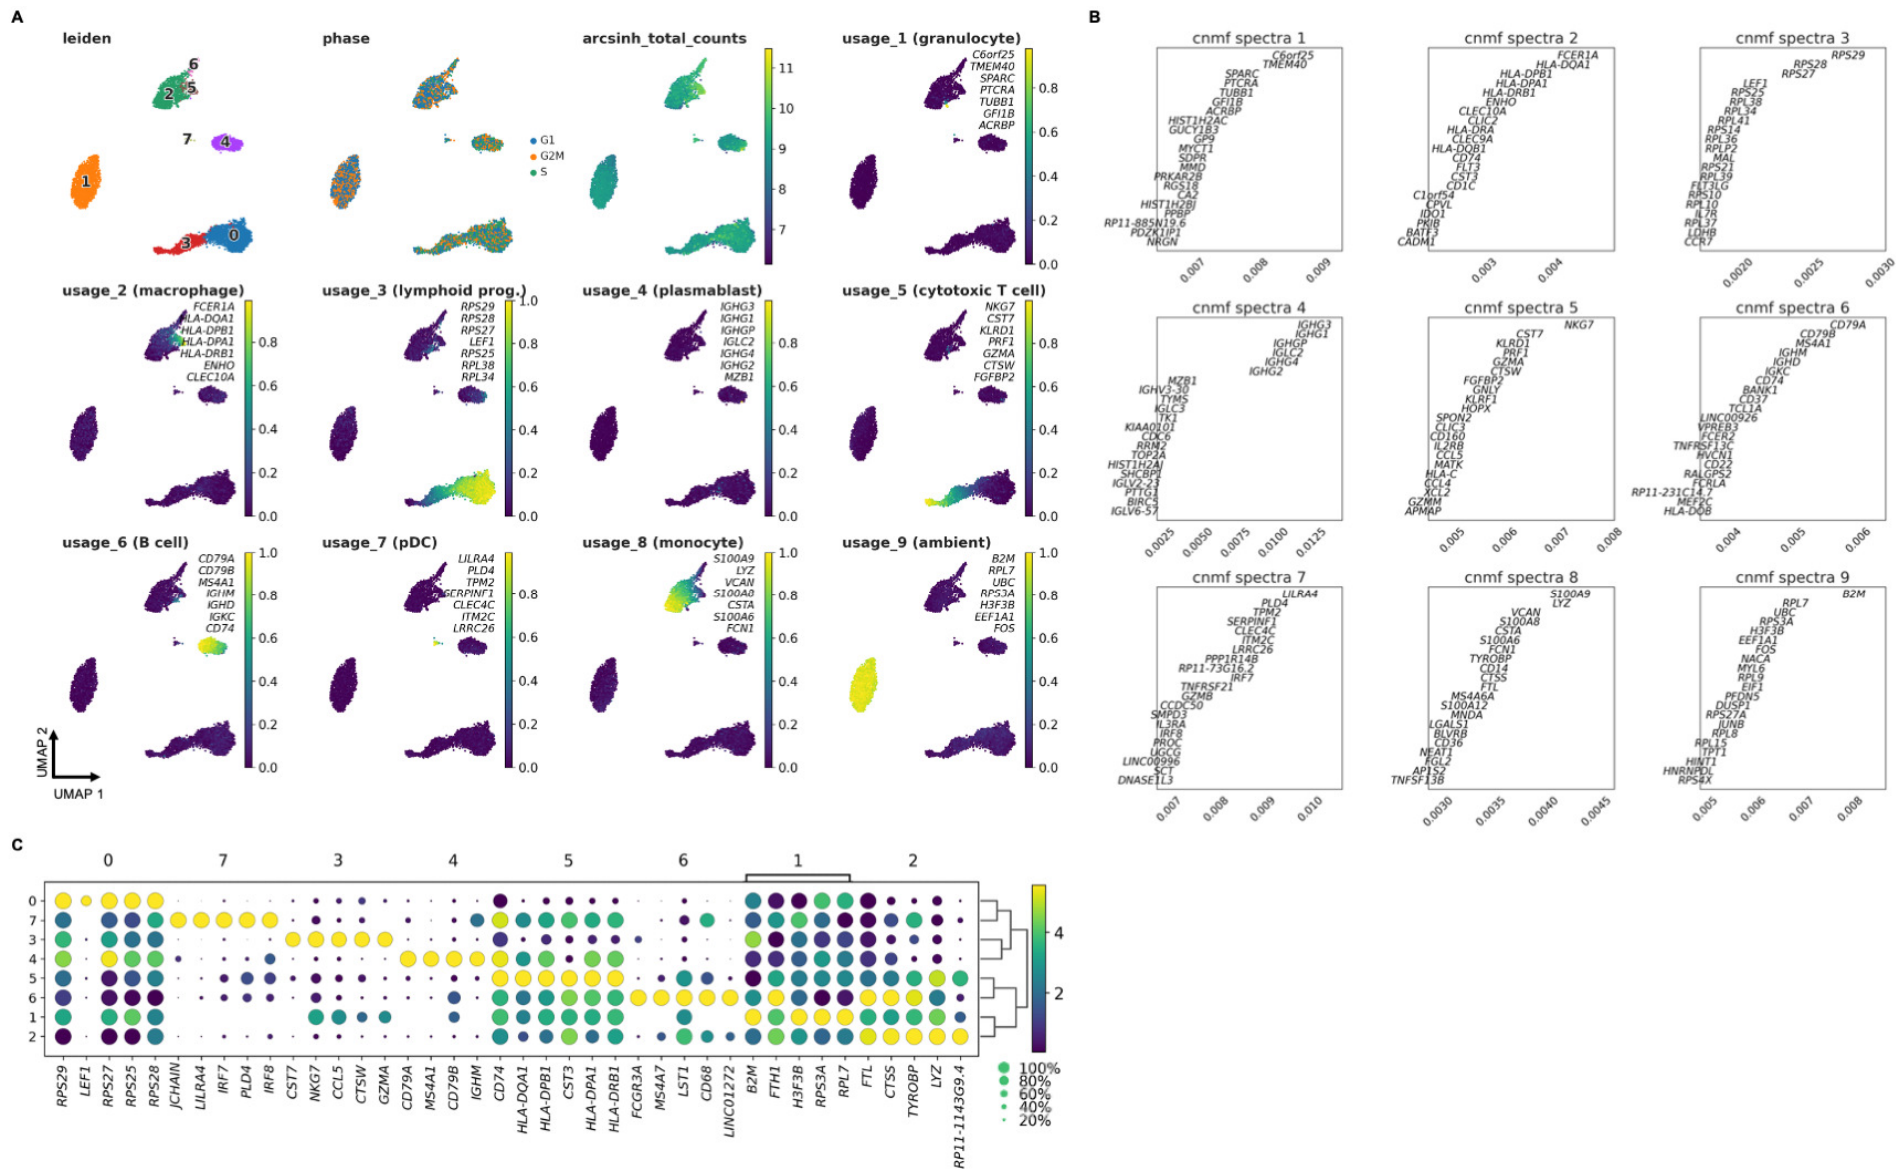

Supplementary Figure 4. Benchmarking dropkick performance on simulated high-background data. A) UMAP embedding of all barcodes kept by dropkick, CellRanger 2, and EmptyDrops. NMF results were used to generate leiden clusters; usage scores shown with a description of each cell type they represent and top 7 gene loadings for each. B) Top 20 gene loadings for each NMF metagene. C) Top 5 differentially expressed genes in the 8 leiden clusters.

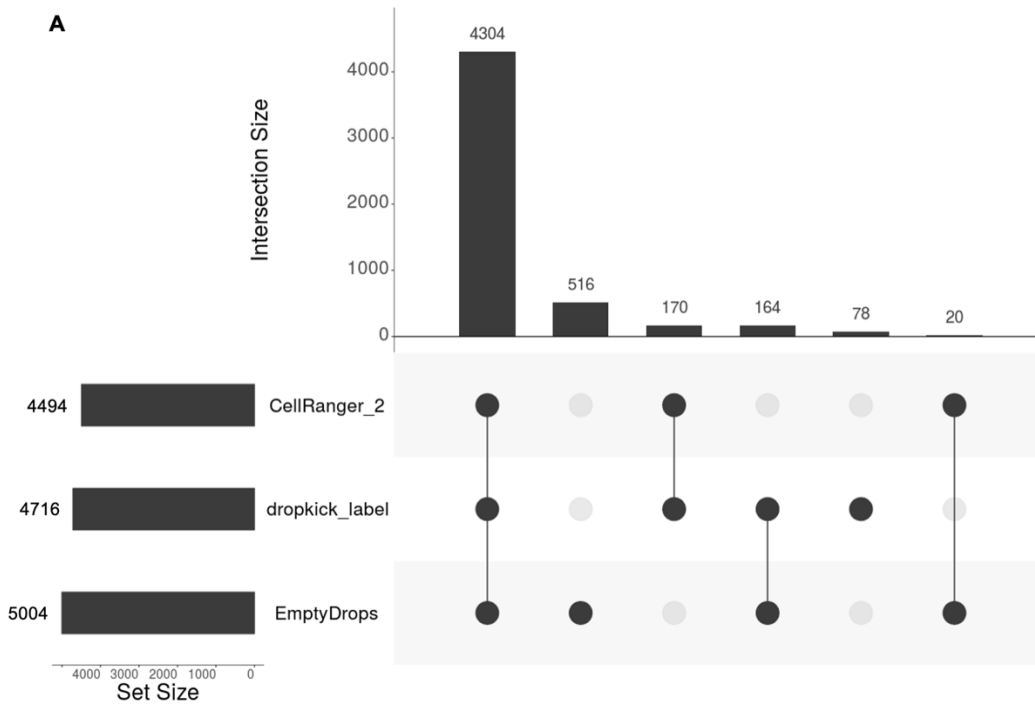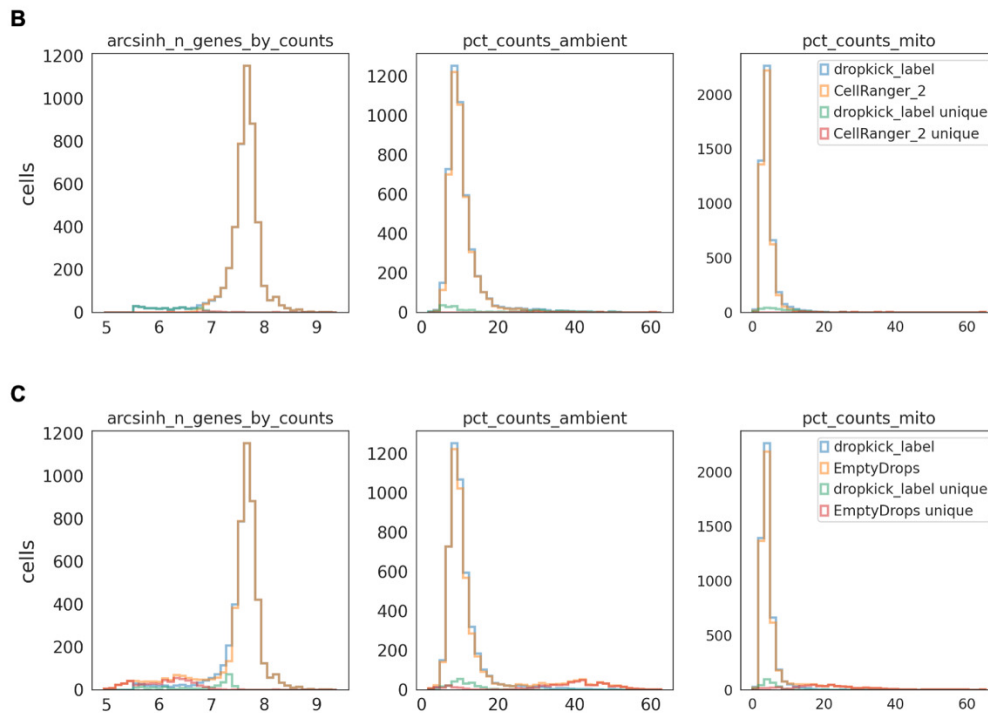

Supplementary Figure 5. Barcode set differences for 4k pan-T cell dataset. A) UpSet plot showing global set differences between dropkick\_label (dropkick score  $\geq 0.5$ ), CellRanger\_2 and EmptyDrops. B) Histograms showing global distribution of heuristics (arcsinh-transformed genes, left, percent ambient counts, middle, and percent mitochondrial counts, right) in barcodes kept by dropkick\_label and CellRanger\_2. Distribution of barcodes unique to each label set also overlaid to show difference. C) Same as in B, for dropkick\_label compared to EmptyDrops.

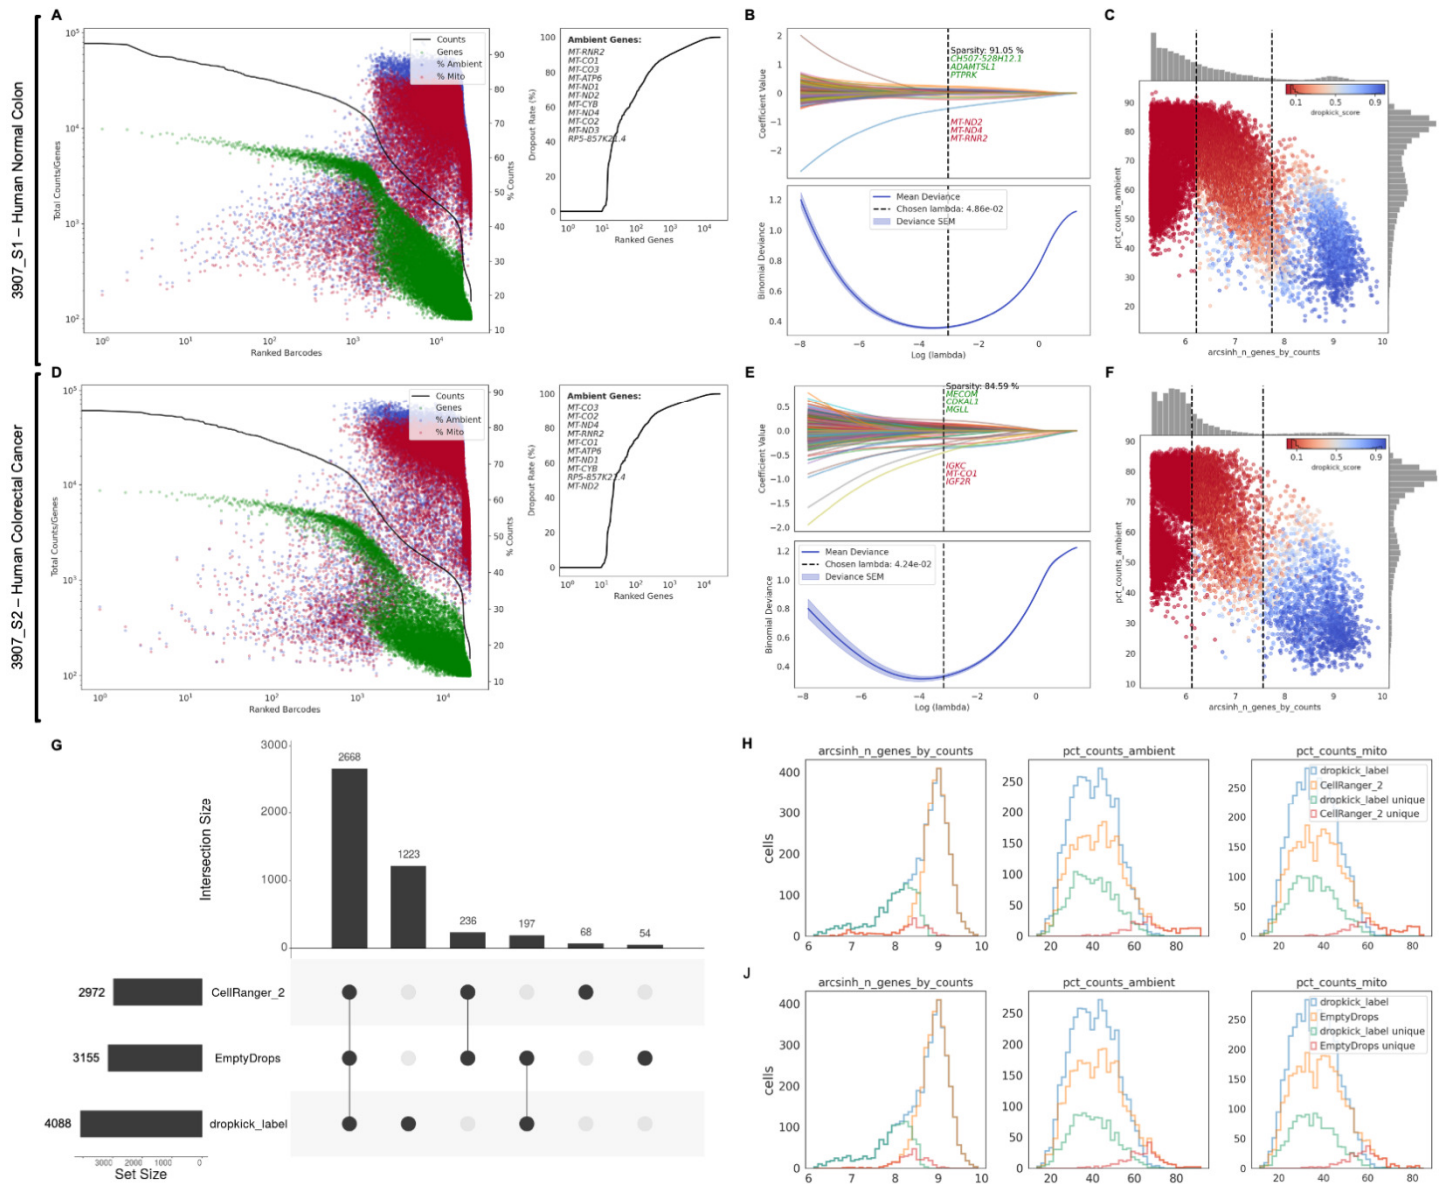

Supplementary Figure 6. dropkick plots and barcode set differences for human colorectal carcinoma (CRC) inDrop samples. A) dropkick QC report for human normal colonic mucosa, 3907\_S1 and CRC, 3907\_S2. B) dropkick coefficient plots, showing coefficient values (top) and binomial deviance (bottom) along the tested lambda regularization path. Dashed line indicates chosen lambda value of trained model. Top and bottom three genes by coefficient value and total model sparsity noted in top plot. C) dropkick score plot showing scatter of percent counts ambient versus arcsinh-transformed total genes detected per barcode. Dashed lines indicate location of automated dropkick thresholds used for model training. Points colored by final dropkick score. D-F) Same as in A-C, but for adjacent human normal colonic mucosa sample, 3907\_S2. G) UpSet plot showing global set differences between dropkick\_label (dropkick score  $\geq 0.5$ ), CellRanger\_2 and EmptyDrops. H) Histograms showing global distribution of heuristics (arcsinh-transformed genes, left, percent ambient counts, middle, and percent mitochondrial counts, right) in barcodes kept by dropkick\_label and CellRanger\_2. Distribution of barcodes unique to each label set also overlaid to show difference. J) Same as in H, for dropkick\_label compared to EmptyDrops.

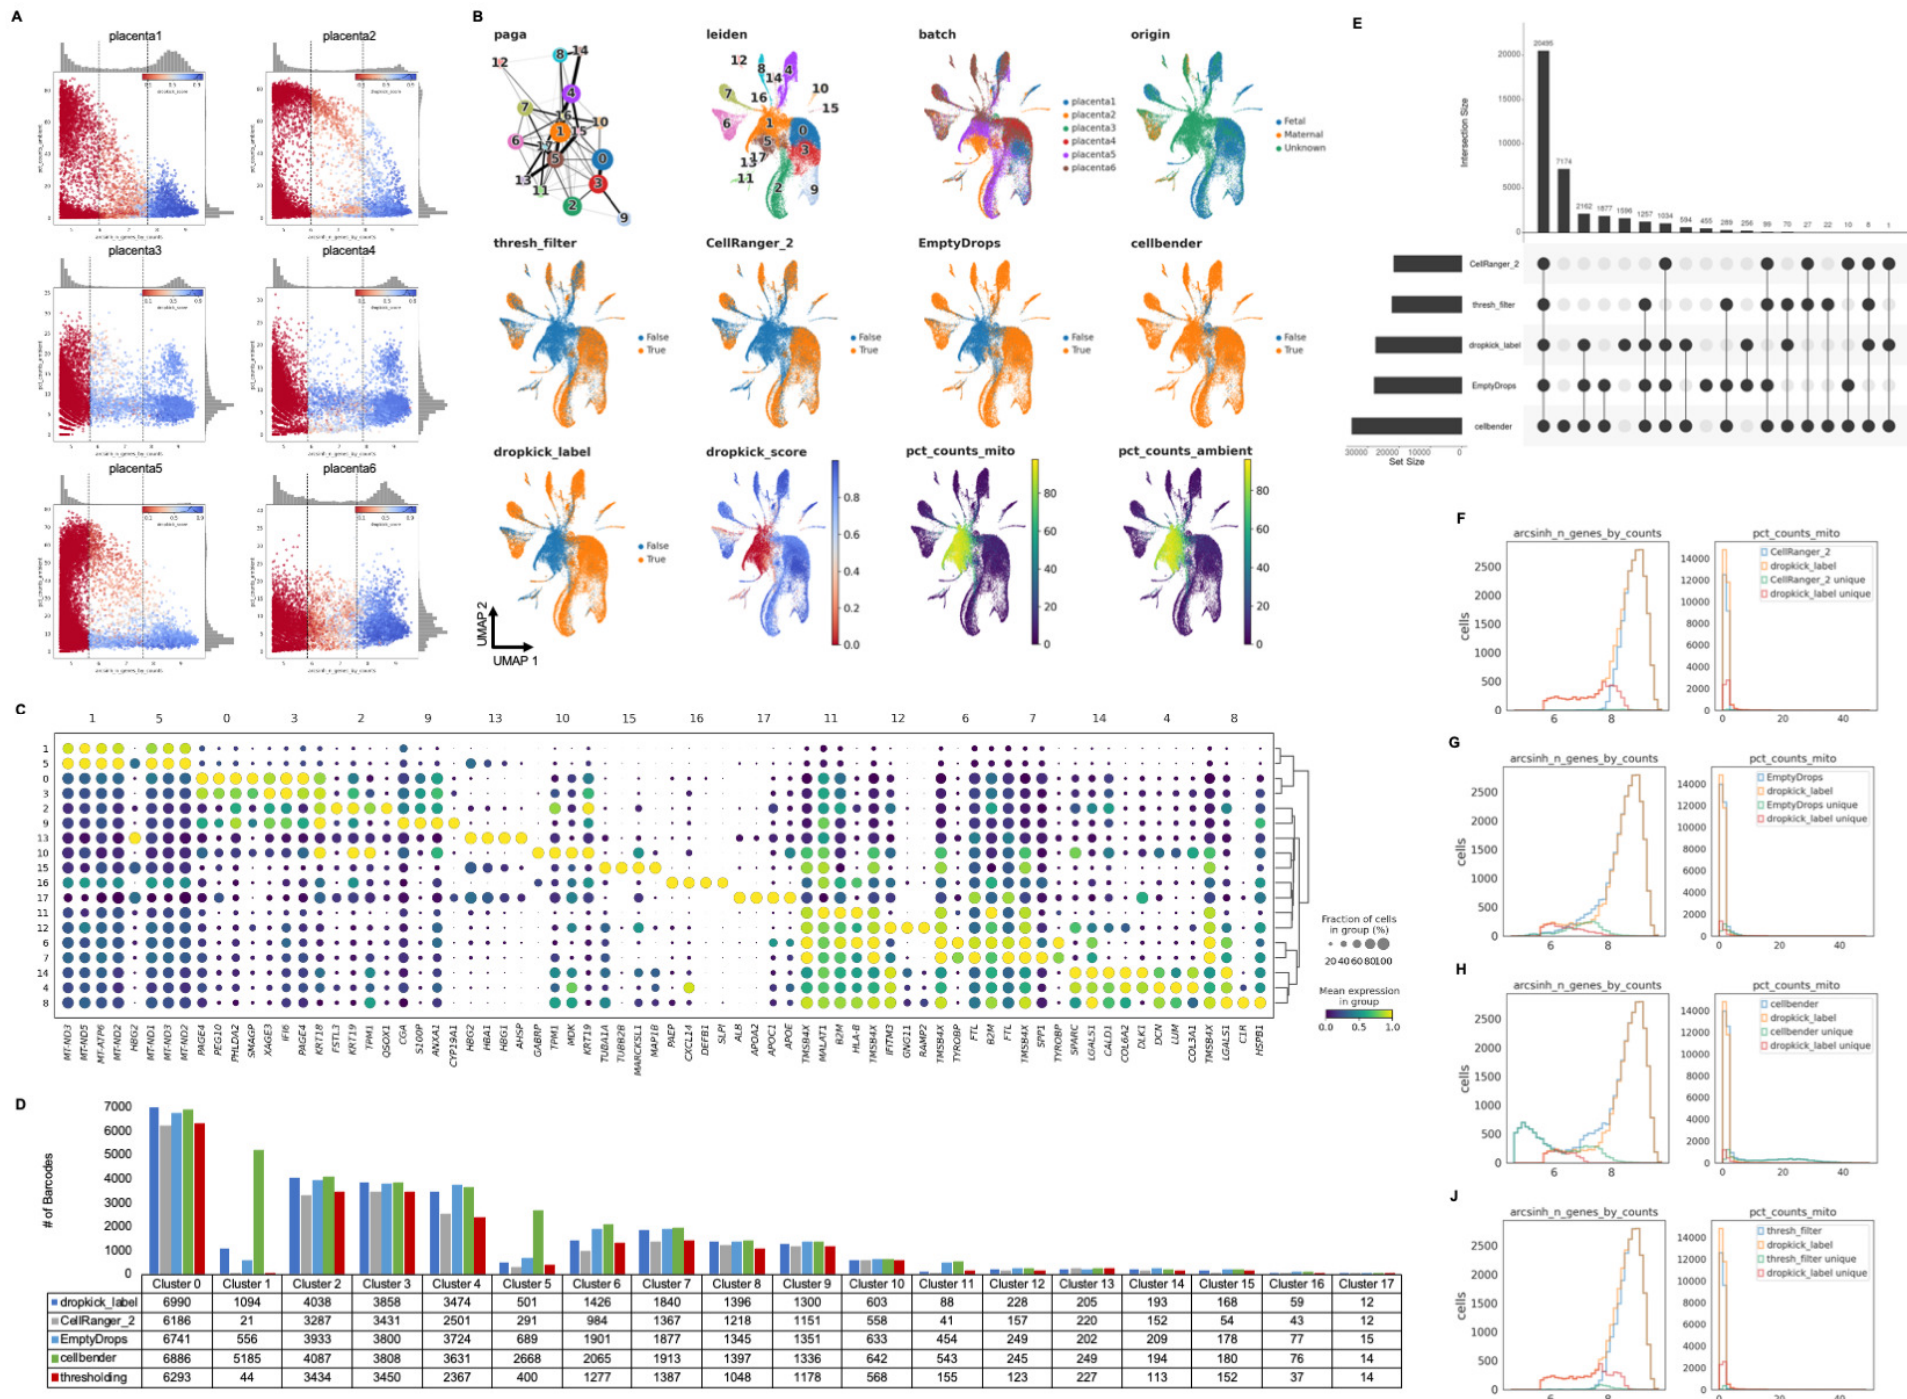

Supplementary Figure 7. dropkick filters reproducibly across scRNA-seq batches. A) dropkick score plots for six placenta replicates. B) PAGA graph and UMAP embedding of all barcodes kept by dropkick\_label (dropkick score  $\geq 0.5$ ), CellRanger\_2, EmptyDrops, CellBender, and bivariate thresholding for the aggregate placenta dataset. Points colored by each of the five filtering labels as well as original batch, tissue of origin, Leiden clusters, dropkick\_score (cell probability), percent counts ambient, and percent counts mitochondrial. C) Dot plot showing top five differentially expressed genes for each cluster. The size of each dot indicates the percentage of cells in the population with nonzero expression for the given gene, while the color indicates the average expression value in that population. D) Table and bar graph enumerating the total number of barcodes detected by each algorithm in all clusters. E) UpSet plot showing global set differences between dropkick\_label, CellRanger\_2, EmptyDrops, CellBender, and bivariate thresholding. F) Histograms showing global distribution of heuristics (arcsinh-transformed genes, left, and percent mitochondrial counts, right) in barcodes kept by dropkick\_label and CellRanger\_2. Distribution of barcodes unique to each label set also overlaid to show difference. G) Same as in F, for dropkick\_label compared to EmptyDrops. H) Same as in F, for dropkick\_label compared to CellBender. J) Same as in F, for dropkick\_label compared to bivariate thresholding.



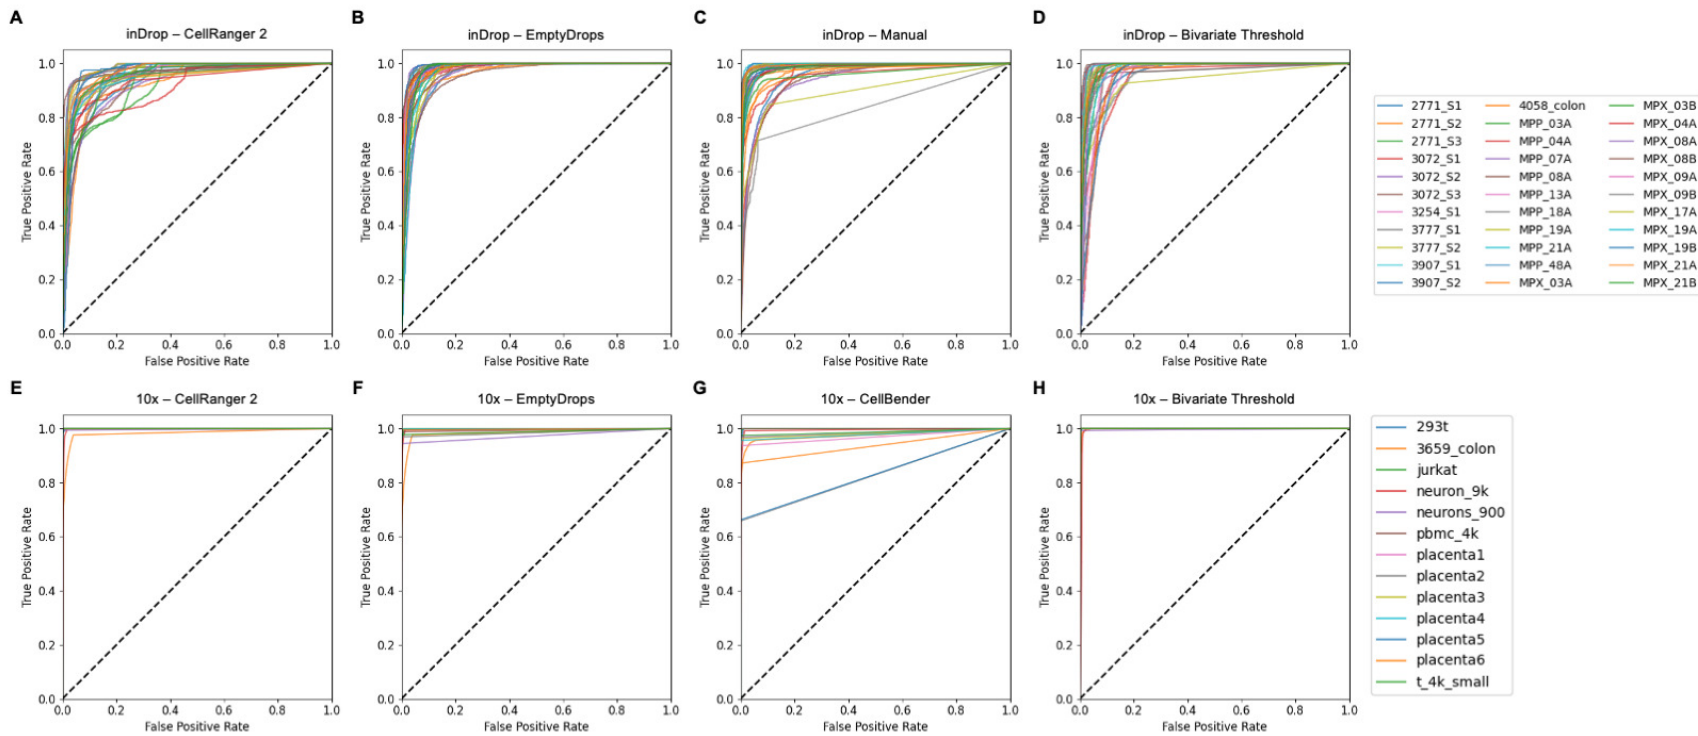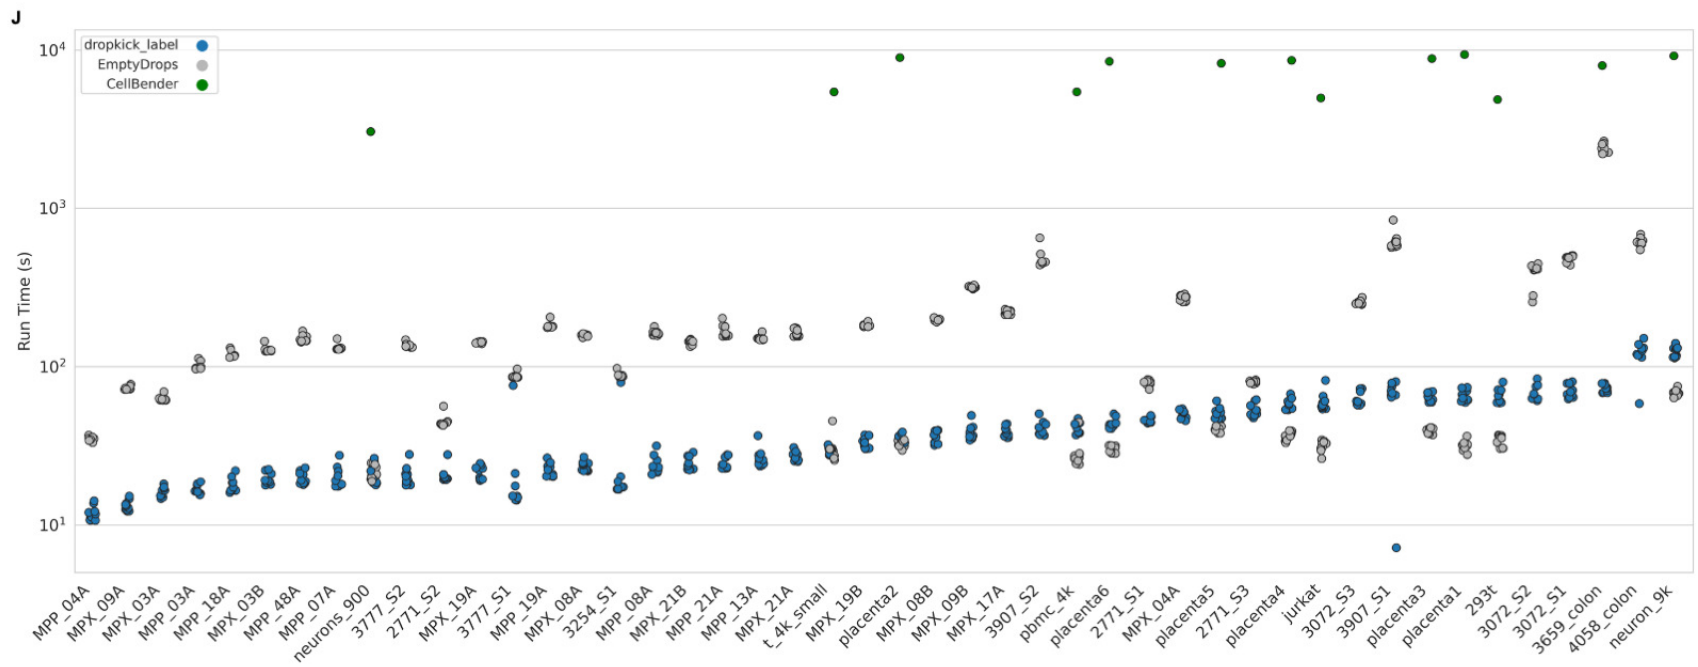

Supplementary Figure 8. Comparing dropkick probability scores to five alternative cell labels using receiver operating characteristic (ROC) curves. AUC = area under the ROC curve. A) ROC curves for 33 inDrop scRNA-seq datasets, using CellRanger\_2 as reference. B) Same as in A, with EmptyDrops as reference. C) Same as in A, with manually curated cell labels as reference (see methods: CellRanger 2, EmptyDrops, CellBender, and manual filtering of real-world scRNA-seq datasets). D) Same as in A, with bivariate thresholding as a reference (see methods: CellRanger 2, EmptyDrops, CellBender, and manual filtering of real-world scRNA-seq datasets). E) ROC curves for 13 10x Genomics scRNA-seq datasets, using CellRanger\_2 as reference. F) Same as in E, with EmptyDrops labels as reference. G) Same as in E, with CellBender remove-background labels as a reference. H) Same as in E, with bivariate thresholding as a reference (see methods: CellRanger 2, EmptyDrops, CellBender, and manual filtering of real-world scRNA-seq datasets). J) Total run time, in seconds, for EmptyDrops, CellBender remove-background, and dropkick. EmptyDrops and dropkick were run ten times on all datasets; CellBender was run once on 10x Genomics samples. Points represent single replicates.

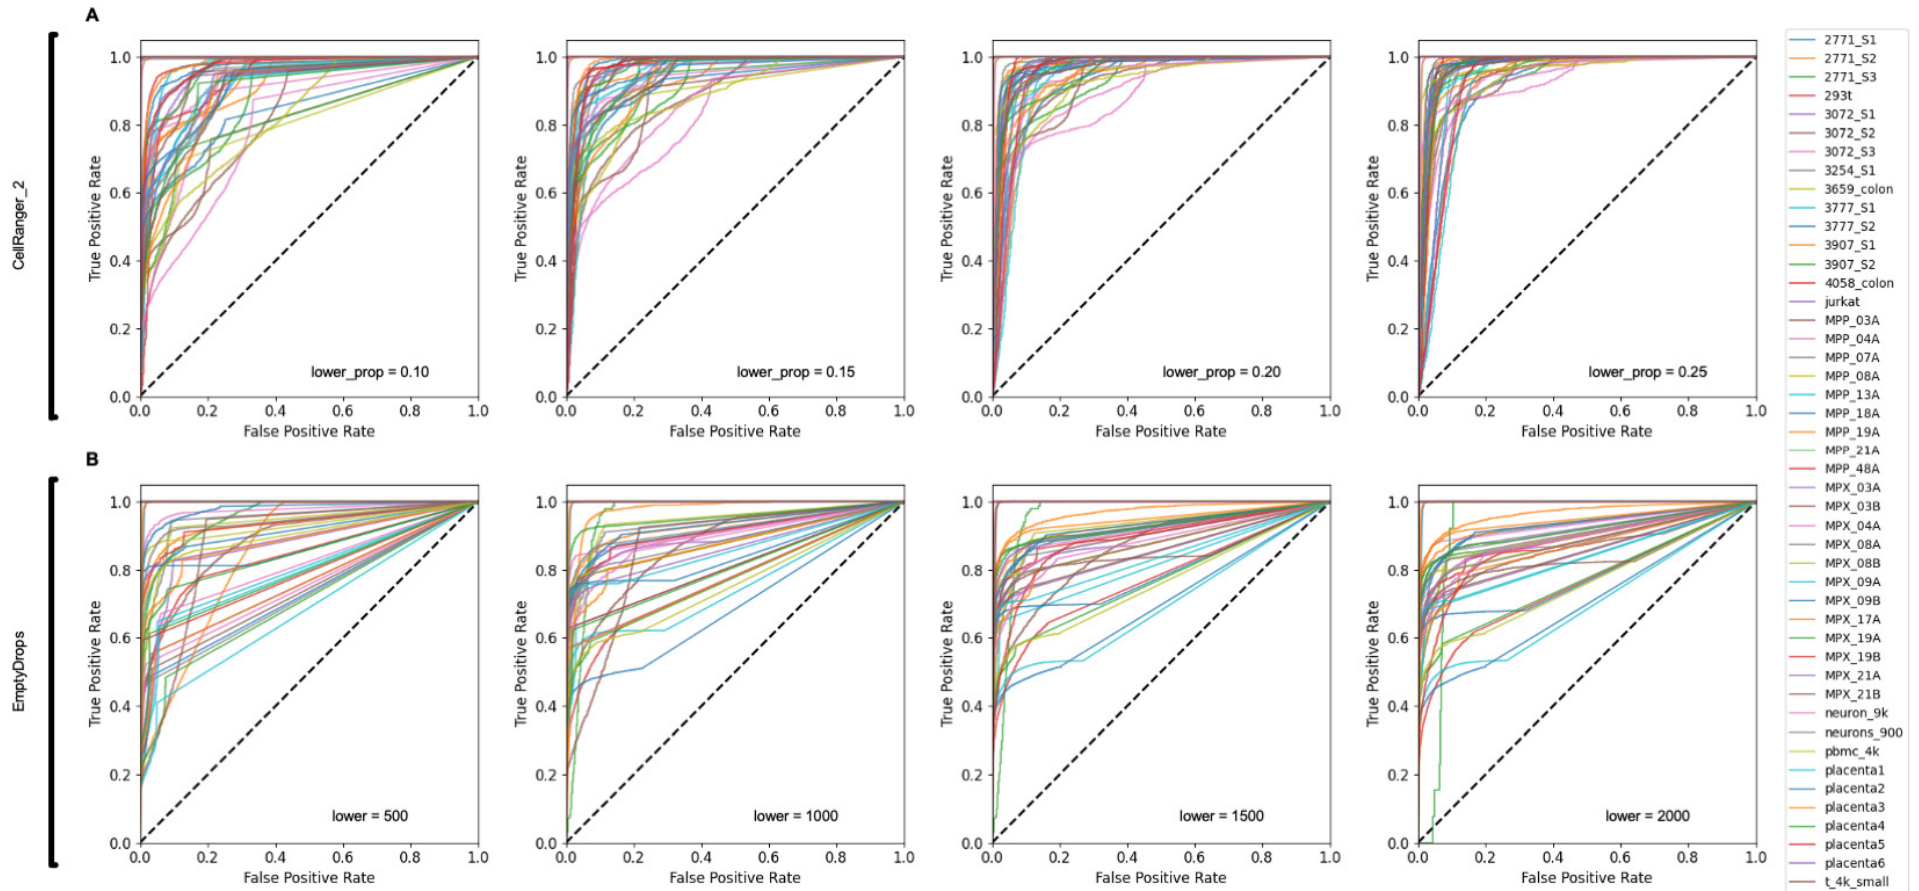

Supplementary Figure 9. Comparing dropkick probability scores to titrations of CellRanger\_2 (A) and EmptyDrops (B) parameters using receiver operating characteristic (ROC) curves. AUC = area under the ROC curve. Results shown for 46 scRNA-seq datasets from 10x Genomics (n = 13) and inDrop (n = 33) encapsulation platforms. The “lower\_prop” parameter in CellRanger version 2 (A) is used to exclude a bottom fraction of total barcodes prior to calculating the knee point of the log-rank total counts curve. The “lower” parameter in EmptyDrops is used to determine the total UMI cutoff below which all droplets are considered empty for model building.

Supplementary Table 1. Global comparison statistics between automated thresholding (dropkick training labels) and trained dropkick model vs. ground-truth cell labels for low and high-background simulations.

| Simulation      | Rep. | Threshold total cells | dropkick label total cells | True label total cells | Threshold sensitivity | Threshold Specificity | Threshold AUC | dropkick Sensitivity | dropkick Specificity | dropkick AUC |
|-----------------|------|-----------------------|----------------------------|------------------------|-----------------------|-----------------------|---------------|----------------------|----------------------|--------------|
| Low Background  | 1    | 3028                  | 3001                       | 3000                   | 0.9983                | 0.9963                | 0.9973        | 1.0000               | 0.9999               | 1.0000       |
|                 | 2    | 3022                  | 3003                       | 3000                   | 0.9990                | 0.9972                | 0.9981        | 1.0000               | 0.9997               | 1.0000       |
|                 | 3    | 3017                  | 3003                       | 3000                   | 0.9990                | 0.9978                | 0.9984        | 1.0000               | 0.9997               | 1.0000       |
|                 | 4    | 3022                  | 3002                       | 3000                   | 0.9967                | 0.9965                | 0.9966        | 1.0000               | 0.9998               | 1.0000       |
|                 | 5    | 3026                  | 3001                       | 3000                   | 0.9990                | 0.9968                | 0.9979        | 1.0000               | 0.9999               | 1.0000       |
|                 | 6    | 3023                  | 3005                       | 3000                   | 0.9987                | 0.9970                | 0.9978        | 1.0000               | 0.9994               | 1.0000       |
|                 | 7    | 3028                  | 3003                       | 3000                   | 0.9983                | 0.9963                | 0.9973        | 1.0000               | 0.9997               | 1.0000       |
|                 | 8    | 3012                  | 3000                       | 3000                   | 0.9983                | 0.9981                | 0.9982        | 1.0000               | 1.0000               | 1.0000       |
|                 | 9    | 3020                  | 3000                       | 3000                   | 0.9990                | 0.9975                | 0.9982        | 1.0000               | 1.0000               | 1.0000       |
|                 | 10   | 3030                  | 3002                       | 3000                   | 0.9993                | 0.9965                | 0.9979        | 1.0000               | 0.9998               | 1.0000       |
| High Background | 1    | 3269                  | 3005                       | 3000                   | 0.8910                | 0.9379                | 0.9124        | 1.0000               | 0.9994               | 1.0000       |
|                 | 2    | 3178                  | 2998                       | 3000                   | 0.8693                | 0.9404                | 0.9030        | 0.9990               | 0.9999               | 0.9995       |
|                 | 3    | 3246                  | 3002                       | 3000                   | 0.8860                | 0.9387                | 0.9103        | 1.0000               | 0.9998               | 1.0000       |
|                 | 4    | 3167                  | 3001                       | 3000                   | 0.8710                | 0.9420                | 0.9047        | 0.9997               | 0.9998               | 0.9998       |
|                 | 5    | 3206                  | 3002                       | 3000                   | 0.8833                | 0.9418                | 0.9108        | 1.0000               | 0.9998               | 1.0000       |
|                 | 6    | 3095                  | 2999                       | 3000                   | 0.8563                | 0.9448                | 0.8989        | 0.9997               | 1.0000               | 0.9998       |
|                 | 7    | 3200                  | 2999                       | 3000                   | 0.8737                | 0.9396                | 0.9047        | 0.9993               | 0.9999               | 0.9997       |
|                 | 8    | 3127                  | 2998                       | 3000                   | 0.8760                | 0.9475                | 0.9103        | 0.9993               | 1.0000               | 0.9997       |
|                 | 9    | 3118                  | 2998                       | 3000                   | 0.8780                | 0.9490                | 0.9121        | 0.9993               | 1.0000               | 0.9997       |
|                 | 10   | 3199                  | 2998                       | 3000                   | 0.8773                | 0.9407                | 0.9072        | 0.9990               | 0.9999               | 0.9995       |

Supplementary Table 2. Global comparison statistics between CellRanger\_2 and EmptyDrops versus ground-truth cell labels for low and high-background simulations.

| Simulation      | Rep. | CellRanger 2 total cells | EmptyDrops total cells | True label total cells | CellRanger 2 sensitivity | CellRanger 2 Specificity | CellRanger 2 AUC | EmptyDrops Sensitivity | EmptyDrops Specificity | EmptyDrops AUC |
|-----------------|------|--------------------------|------------------------|------------------------|--------------------------|--------------------------|------------------|------------------------|------------------------|----------------|
| Low Background  | 1    | 3000                     | 3001                   | 3000                   | 1.0000                   | 1.0000                   | 1.0000           | 1.0000                 | 1.0000                 | 1.0000         |
|                 | 2    | 3000                     | 3003                   | 3000                   | 1.0000                   | 1.0000                   | 1.0000           | 0.9997                 | 1.0000                 | 0.9998         |
|                 | 3    | 3000                     | 3003                   | 3000                   | 1.0000                   | 1.0000                   | 1.0000           | 0.9997                 | 1.0000                 | 0.9998         |
|                 | 4    | 3000                     | 3002                   | 3000                   | 1.0000                   | 1.0000                   | 1.0000           | 0.9997                 | 1.0000                 | 0.9998         |
|                 | 5    | 3000                     | 3001                   | 3000                   | 1.0000                   | 1.0000                   | 1.0000           | 0.9993                 | 1.0000                 | 0.9997         |
|                 | 6    | 3000                     | 3005                   | 3000                   | 1.0000                   | 1.0000                   | 1.0000           | 0.9997                 | 1.0000                 | 0.9998         |
|                 | 7    | 3000                     | 3003                   | 3000                   | 1.0000                   | 1.0000                   | 1.0000           | 0.9997                 | 1.0000                 | 0.9998         |
|                 | 8    | 3000                     | 3000                   | 3000                   | 1.0000                   | 1.0000                   | 1.0000           | 0.9997                 | 1.0000                 | 0.9998         |
|                 | 9    | 3000                     | 3000                   | 3000                   | 1.0000                   | 1.0000                   | 1.0000           | 0.9997                 | 1.0000                 | 0.9998         |
|                 | 10   | 3000                     | 3002                   | 3000                   | 1.0000                   | 1.0000                   | 1.0000           | 1.0000                 | 1.0000                 | 1.0000         |
| High Background | 1    | 3070                     | 3005                   | 3000                   | 1.0000                   | 0.9923                   | 0.9961           | 1.0000                 | 0.9881                 | 0.9940         |
|                 | 2    | 3061                     | 2998                   | 3000                   | 1.0000                   | 0.9933                   | 0.9966           | 1.0000                 | 0.9938                 | 0.9969         |
|                 | 3    | 3091                     | 3002                   | 3000                   | 1.0000                   | 0.9900                   | 0.9949           | 1.0000                 | 0.9807                 | 0.9902         |
|                 | 4    | 3079                     | 3001                   | 3000                   | 1.0000                   | 0.9913                   | 0.9956           | 1.0000                 | 0.9921                 | 0.9960         |
|                 | 5    | 3077                     | 3002                   | 3000                   | 1.0000                   | 0.9915                   | 0.9957           | 1.0000                 | 0.9848                 | 0.9923         |
|                 | 6    | 3077                     | 2999                   | 3000                   | 1.0000                   | 0.9915                   | 0.9957           | 1.0000                 | 0.9914                 | 0.9957         |
|                 | 7    | 3055                     | 2999                   | 3000                   | 1.0000                   | 0.9939                   | 0.9969           | 1.0000                 | 0.9461                 | 0.9715         |
|                 | 8    | 3103                     | 2998                   | 3000                   | 1.0000                   | 0.9887                   | 0.9943           | 1.0000                 | 0.9851                 | 0.9924         |
|                 | 9    | 3093                     | 2998                   | 3000                   | 1.0000                   | 0.9898                   | 0.9948           | 1.0000                 | 0.9925                 | 0.9962         |
|                 | 10   | 3111                     | 2998                   | 3000                   | 1.0000                   | 0.9878                   | 0.9938           | 1.0000                 | 0.9838                 | 0.9918         |

Supplementary Table 3. Global comparison statistics between dropkick, CellRanger\_2, and EmptyDrops for 13 10x Genomics scRNA-seq datasets.

|             | dropkick label total cells | CellRanger 2 total cells | CellRanger 2 sensitivity | CellRanger 2 specificity | CellRanger 2 AUC | EmptyDrops total cells | EmptyDrops sensitivity | EmptyDrops specificity | EmptyDrops AUC |
|-------------|----------------------------|--------------------------|--------------------------|--------------------------|------------------|------------------------|------------------------|------------------------|----------------|
| 293t        | 3224                       | 2897                     | 0.9717                   | 0.9986                   | 0.9994           | 3028                   | 0.9508                 | 0.9988                 | 0.9991         |
| jurkat      | 4020                       | 3259                     | 0.9963                   | 0.9974                   | 0.9989           | 3452                   | 0.9655                 | 0.9977                 | 0.9985         |
| neuron_9k   | 11050                      | 9094                     | 0.8745                   | 0.9958                   | 0.9964           | 11027                  | 0.8422                 | 0.9976                 | 0.9950         |
| neurons_900 | 1297                       | 792                      | 0.9369                   | 0.9992                   | 0.9963           | 1940                   | 0.6649                 | 1.0000                 | 0.9721         |
| pbmc_4k     | 4830                       | 4335                     | 0.9993                   | 0.9993                   | 0.9999           | 4231                   | 0.9804                 | 0.9991                 | 0.9935         |
| t_4k_small  | 4716                       | 4494                     | 0.9955                   | 0.9993                   | 0.9998           | 5004                   | 0.8929                 | 0.9993                 | 0.9884         |
| placenta1   | 6285                       | 5636                     | 0.9963                   | 0.9991                   | 0.9999           | 7149                   | 0.8741                 | 1.0000                 | 0.9983         |
| placenta2   | 2771                       | 2101                     | 0.9700                   | 0.9990                   | 0.9997           | 3530                   | 0.7697                 | 0.9999                 | 0.9844         |
| placenta3   | 5373                       | 4019                     | 0.9988                   | 0.9982                   | 0.9997           | 4600                   | 0.9833                 | 0.9988                 | 0.9987         |
| placenta4   | 5038                       | 3906                     | 0.9964                   | 0.9984                   | 0.9996           | 4532                   | 0.9709                 | 0.9991                 | 0.9981         |
| placenta5   | 4064                       | 2723                     | 0.9927                   | 0.9982                   | 0.9994           | 3885                   | 0.8976                 | 0.9992                 | 0.9972         |
| placenta6   | 3942                       | 3289                     | 0.9960                   | 0.9991                   | 0.9998           | 4238                   | 0.9033                 | 0.9998                 | 0.9971         |
| 3659_colon  | 3376                       | 5649                     | 0.5936                   | 1.0000                   | 0.9877           | 5655                   | 0.5929                 | 1.0000                 | 0.9878         |

Supplementary Table 4. Global comparison statistics between dropkick, CellRanger\_2 and EmptyDrops for 33 inDrop scRNA-seq datasets.

|            | dropkick label total cells | CellRanger 2 total cells | CellRanger 2 sensitivity | CellRanger 2 specificity | CellRanger 2 AUC | EmptyDrops total cells | EmptyDrops sensitivity | EmptyDrops specificity | EmptyDrops AUC |
|------------|----------------------------|--------------------------|--------------------------|--------------------------|------------------|------------------------|------------------------|------------------------|----------------|
| 2771 S1    | 2222                       | 2401                     | 0.7380                   | 0.9264                   | 0.9263           | 2519                   | 0.7594                 | 0.9472                 | 0.9590         |
| 2771 S2    | 1248                       | 925                      | 0.8465                   | 0.9031                   | 0.9237           | 1219                   | 0.8515                 | 0.9506                 | 0.9634         |
| 2771 S3    | 1382                       | 1422                     | 0.6392                   | 0.9643                   | 0.9154           | 983                    | 0.8688                 | 0.9616                 | 0.9771         |
| 3072 S1    | 962                        | 1536                     | 0.5137                   | 0.9899                   | 0.9619           | 1049                   | 0.6616                 | 0.9848                 | 0.9788         |
| 3072 S2    | 2370                       | 2239                     | 0.6807                   | 0.9434                   | 0.9196           | 1571                   | 0.8250                 | 0.9322                 | 0.9531         |
| 3072 S3    | 3112                       | 2873                     | 0.8190                   | 0.9102                   | 0.9331           | 3210                   | 0.8059                 | 0.9334                 | 0.9485         |
| 3254 S1    | 1285                       | 1356                     | 0.8201                   | 0.9536                   | 0.9501           | 1235                   | 0.8907                 | 0.9521                 | 0.9783         |
| 3777 S1    | 1066                       | 828                      | 0.9541                   | 0.9082                   | 0.9669           | 908                    | 0.9361                 | 0.9247                 | 0.9735         |
| 3777 S2    | 927                        | 1205                     | 0.6929                   | 0.9802                   | 0.9435           | 1699                   | 0.5221                 | 0.9902                 | 0.9712         |
| 3907 S1    | 2260                       | 2016                     | 0.8661                   | 0.9788                   | 0.9782           | 1948                   | 0.9004                 | 0.9792                 | 0.9892         |
| 3907 S2    | 1828                       | 2057                     | 0.7321                   | 0.9828                   | 0.9652           | 1207                   | 0.9205                 | 0.9641                 | 0.9840         |
| 4058 colon | 2186                       | 2155                     | 0.7940                   | 0.9827                   | 0.9788           | 1973                   | 0.8246                 | 0.9798                 | 0.9790         |
| MPP 03A    | 945                        | 997                      | 0.6861                   | 0.9534                   | 0.9224           | 914                    | 0.8271                 | 0.9663                 | 0.9771         |
| MPP 04A    | 702                        | 766                      | 0.8055                   | 0.9365                   | 0.9281           | 847                    | 0.8040                 | 0.9824                 | 0.9842         |
| MPP 07A    | 1384                       | 1352                     | 0.9098                   | 0.9761                   | 0.9837           | 1256                   | 0.9594                 | 0.9728                 | 0.9895         |
| MPP 08A    | 1473                       | 1601                     | 0.7077                   | 0.9597                   | 0.9290           | 1433                   | 0.8130                 | 0.9641                 | 0.9692         |
| MPP 13A    | 1815                       | 1634                     | 0.8782                   | 0.9501                   | 0.9563           | 1744                   | 0.8893                 | 0.9643                 | 0.9744         |
| MPP 18A    | 875                        | 753                      | 0.8539                   | 0.9655                   | 0.9558           | 661                    | 0.9213                 | 0.9612                 | 0.9799         |
| MPP 19A    | 1503                       | 1477                     | 0.8538                   | 0.9732                   | 0.9809           | 1416                   | 0.8905                 | 0.9734                 | 0.9876         |
| MPP 21A    | 2149                       | 2096                     | 0.8545                   | 0.9522                   | 0.9574           | 1518                   | 0.9697                 | 0.9193                 | 0.9663         |
| MPP 48A    | 811                        | 287                      | 0.9477                   | 0.9389                   | 0.9652           | 934                    | 0.8084                 | 0.9927                 | 0.9931         |
| MPX 03A    | 1228                       | 1197                     | 0.8797                   | 0.9370                   | 0.9471           | 1217                   | 0.9260                 | 0.9624                 | 0.9872         |
| MPX 03B    | 407                        | 782                      | 0.3964                   | 0.9861                   | 0.9343           | 493                    | 0.5558                 | 0.9818                 | 0.9779         |
| MPX 04A    | 744                        | 975                      | 0.6338                   | 0.9900                   | 0.9136           | 730                    | 0.8274                 | 0.9891                 | 0.9878         |
| MPX 08A    | 1277                       | 1100                     | 0.8236                   | 0.9563                   | 0.9599           | 906                    | 0.9183                 | 0.9492                 | 0.9767         |
| MPX 08B    | 947                        | 962                      | 0.8753                   | 0.9889                   | 0.9751           | 1050                   | 0.8333                 | 0.9923                 | 0.9915         |
| MPX 09A    | 549                        | 507                      | 0.7929                   | 0.9655                   | 0.9622           | 609                    | 0.8144                 | 0.9870                 | 0.9857         |
| MPX 09B    | 1462                       | 1235                     | 0.8899                   | 0.9767                   | 0.9785           | 1143                   | 0.9283                 | 0.9745                 | 0.9850         |
| MPX 17A    | 889                        | 813                      | 0.7282                   | 0.9751                   | 0.9638           | 1347                   | 0.5457                 | 0.9863                 | 0.9709         |
| MPX 19A    | 857                        | 798                      | 0.7406                   | 0.9673                   | 0.9630           | 865                    | 0.7260                 | 0.9715                 | 0.9737         |
| MPX 19B    | 2830                       | 2753                     | 0.8794                   | 0.9493                   | 0.9709           | 2769                   | 0.9029                 | 0.9586                 | 0.9804         |
| MPX 21A    | 1647                       | 1629                     | 0.8422                   | 0.9660                   | 0.9713           | 1622                   | 0.8662                 | 0.9700                 | 0.9812         |
| MPX 21B    | 1377                       | 1287                     | 0.8143                   | 0.9541                   | 0.9608           | 1020                   | 0.9255                 | 0.9426                 | 0.9748         |

Supplementary Table 5. Global comparison statistics between dropkick and manual cell labelling for 13 10x Genomics scRNA-seq datasets. “Thresholding” refers to bivariate thresholding on total counts and mitochondrial percentage (see Methods: CellRanger 2, EmptyDrops, CellBender, and manual filtering of real-world scRNA-seq datasets).

|             | dropkick label total cells | CellBender total cells | CellBender sensitivity | CellBender specificity | CellBender AUC | Thresholding total cells | Thresholding sensitivity | Thresholding specificity | Thresholding AUC |
|-------------|----------------------------|------------------------|------------------------|------------------------|----------------|--------------------------|--------------------------|--------------------------|------------------|
| 293t        | 3224                       | 3007                   | 0.9488                 | 0.9987                 | 0.9993         | 2454                     | 0.9833                   | 0.9972                   | 0.9987           |
| jurkat      | 4020                       | 3310                   | 0.9909                 | 0.9975                 | 0.9990         | 2820                     | 0.9996                   | 0.9959                   | 0.9982           |
| neuron_9k   | 11050                      | 10937                  | 0.8207                 | 0.9972                 | 0.9939         | 6278                     | 0.8767                   | 0.9925                   | 0.9946           |
| neurons_900 | 1297                       | 1483                   | 0.8213                 | 0.9999                 | 0.9837         | 815                      | 0.9362                   | 0.9993                   | 0.9958           |
| pbmc_4k     | 4830                       | 4759                   | 0.9950                 | 0.9999                 | 0.9998         | 3339                     | 1.0000                   | 0.9980                   | 0.9994           |
| t_4k_small  | 4716                       | 5153                   | 0.8921                 | 0.9997                 | 0.9867         | 3487                     | 0.9997                   | 0.9966                   | 0.9992           |
| placenta1   | 6285                       | 7859                   | 0.7969                 | 1.0000                 | 0.9681         | 5628                     | 0.9963                   | 0.9991                   | 0.9999           |
| placenta2   | 2771                       | 5773                   | 0.4745                 | 1.0000                 | 0.8289         | 2819                     | 0.8915                   | 0.9996                   | 0.9997           |
| placenta3   | 5373                       | 5055                   | 0.9318                 | 0.9991                 | 0.9816         | 4343                     | 0.9965                   | 0.9986                   | 0.9998           |
| placenta4   | 5038                       | 5076                   | 0.9088                 | 0.9994                 | 0.9778         | 4242                     | 0.9873                   | 0.9988                   | 0.9997           |
| placenta5   | 4064                       | 6336                   | 0.5418                 | 0.9991                 | 0.8308         | 2977                     | 0.9886                   | 0.9985                   | 0.9995           |
| placenta6   | 3942                       | 5020                   | 0.7695                 | 0.9999                 | 0.9358         | 2258                     | 0.9969                   | 0.9977                   | 0.9991           |
| 3659_colon  | 3376                       | 4261                   | 0.7728                 | 0.9989                 | 0.9750         | 2873                     | 0.9715                   | 0.9927                   | 0.9979           |

Supplementary Table 6. Global comparison statistics between dropkick and manual cell labelling for 33 inDrop scRNA-seq datasets. “Manual label” refers to the manual cluster gating, while “Thresholding” refers to bivariate thresholding on total counts and mitochondrial percentage (see Methods: CellRanger 2, EmptyDrops, CellBender, and manual filtering of real-world scRNA-seq datasets).

|            | dropkick label total cells | Manual label total cells | Manual label sensitivity | Manual label specificity | Manual label AUC | Thresholding total cells | Thresholding sensitivity | Thresholding specificity | Thresholding AUC |
|------------|----------------------------|--------------------------|--------------------------|--------------------------|------------------|--------------------------|--------------------------|--------------------------|------------------|
| 2771 S1    | 2222                       | 2715                     | 0.7193                   | 0.9521                   | 0.9515           | 2643                     | 0.7465                   | 0.9561                   | 0.9598           |
| 2771 S2    | 1248                       | 1536                     | 0.7637                   | 0.9802                   | 0.9635           | 1305                     | 0.8705                   | 0.9724                   | 0.9841           |
| 2771 S3    | 1382                       | 1303                     | 0.8365                   | 0.9778                   | 0.9854           | 1288                     | 0.8168                   | 0.9751                   | 0.9834           |
| 3072 S1    | 962                        | 2639                     | 0.3297                   | 0.9942                   | 0.9360           | 2837                     | 0.3123                   | 0.9952                   | 0.9424           |
| 3072 S2    | 2370                       | 2725                     | 0.6712                   | 0.9618                   | 0.9382           | 3500                     | 0.6291                   | 0.9871                   | 0.9752           |
| 3072 S3    | 3112                       | 2990                     | 0.8084                   | 0.9160                   | 0.9375           | 8809                     | 0.3494                   | 0.9810                   | 0.9415           |
| 3254 S1    | 1285                       | 1442                     | 0.8336                   | 0.9766                   | 0.9829           | 920                      | 0.8848                   | 0.8945                   | 0.9544           |
| 3777 S1    | 1066                       | 2253                     | 0.4589                   | 0.9761                   | 0.8325           | 1239                     | 0.7627                   | 0.9505                   | 0.9446           |
| 3777 S2    | 927                        | 2326                     | 0.3947                   | 0.9974                   | 0.8971           | 1729                     | 0.5095                   | 0.9887                   | 0.9302           |
| 3907 S1    | 2260                       | 2288                     | 0.8488                   | 0.9866                   | 0.9909           | 1271                     | 0.8812                   | 0.9555                   | 0.9847           |
| 3907 S2    | 1828                       | 2003                     | 0.8522                   | 0.9935                   | 0.9920           | 1284                     | 0.9829                   | 0.9713                   | 0.9943           |
| 4058 colon | 2186                       | 2182                     | 0.7988                   | 0.9838                   | 0.9796           | 1930                     | 0.8187                   | 0.9782                   | 0.9787           |
| MPP 03A    | 945                        | 993                      | 0.8449                   | 0.9805                   | 0.9793           | 203                      | 1.0000                   | 0.8920                   | 0.9740           |
| MPP 04A    | 702                        | 854                      | 0.7787                   | 0.9692                   | 0.9684           | 349                      | 1.0000                   | 0.8256                   | 0.9502           |
| MPP 07A    | 1384                       | 1397                     | 0.9170                   | 0.9838                   | 0.9916           | 856                      | 0.9988                   | 0.9278                   | 0.9855           |
| MPP 08A    | 1473                       | 1548                     | 0.8637                   | 0.9836                   | 0.9834           | 687                      | 0.9840                   | 0.9188                   | 0.9778           |
| MPP 13A    | 1815                       | 1794                     | 0.9498                   | 0.9845                   | 0.9942           | 969                      | 0.9876                   | 0.9020                   | 0.9587           |
| MPP 18A    | 875                        | 834                      | 0.9329                   | 0.9851                   | 0.9925           | 444                      | 0.9955                   | 0.9402                   | 0.9878           |
| MPP 19A    | 1503                       | 1719                     | 0.8214                   | 0.9895                   | 0.9896           | 1116                     | 0.9839                   | 0.9577                   | 0.9880           |
| MPP 21A    | 2149                       | 2149                     | 0.9614                   | 0.9884                   | 0.9966           | 682                      | 1.0000                   | 0.8535                   | 0.9726           |
| MPP 48A    | 811                        | 785                      | 0.8994                   | 0.9867                   | 0.9948           | 410                      | 0.9902                   | 0.9527                   | 0.9787           |
| MPX 03A    | 1228                       | 1242                     | 0.8712                   | 0.9460                   | 0.9643           | 689                      | 0.9942                   | 0.8514                   | 0.9510           |
| MPX 03B    | 407                        | 1313                     | 0.3024                   | 0.9984                   | 0.9583           | 365                      | 0.7178                   | 0.9806                   | 0.9840           |
| MPX 04A    | 744                        | 818                      | 0.8264                   | 0.9947                   | 0.9883           | 346                      | 0.9855                   | 0.9702                   | 0.9937           |
| MPX 08A    | 1277                       | 1200                     | 0.9225                   | 0.9792                   | 0.9917           | 597                      | 0.9832                   | 0.9259                   | 0.9831           |
| MPX 08B    | 947                        | 872                      | 0.9507                   | 0.9876                   | 0.9960           | 648                      | 0.9954                   | 0.9697                   | 0.9974           |
| MPX 09A    | 549                        | 590                      | 0.8678                   | 0.9909                   | 0.9896           | 306                      | 0.9935                   | 0.9463                   | 0.9801           |
| MPX 09B    | 1462                       | 1455                     | 0.9162                   | 0.9915                   | 0.9949           | 962                      | 0.9844                   | 0.9679                   | 0.9890           |
| MPX 17A    | 889                        | 691                      | 0.9450                   | 0.9803                   | 0.9950           | 663                      | 0.8869                   | 0.9751                   | 0.9899           |
| MPX 19A    | 857                        | 880                      | 0.8045                   | 0.9812                   | 0.9874           | 535                      | 0.9832                   | 0.9609                   | 0.9908           |
| MPX 19B    | 2830                       | 2807                     | 0.9184                   | 0.9679                   | 0.9853           | 1280                     | 0.9898                   | 0.8538                   | 0.9469           |
| MPX 21A    | 1647                       | 1615                     | 0.9467                   | 0.9851                   | 0.9923           | 889                      | 0.9888                   | 0.9176                   | 0.9866           |
| MPX 21B    | 1377                       | 1369                     | 0.9065                   | 0.9803                   | 0.9867           | 666                      | 0.9895                   | 0.9122                   | 0.9834           |



Supplementary Table 7. Parameters used for filtering techniques on all 46 samples. “Chosen alpha” describes the optimal alpha chosen by the dropkick filtering model when cross validated using alphas from [0.1, 0.25, 0.5, 0.75, 0.9]. All other results discussed in this manuscript have alpha set to 0.1 by default.

|             |            | EmptyDrops     | CellRanger | Bivariate Threshold |              | CellBender              | dropkick     |
|-------------|------------|----------------|------------|---------------------|--------------|-------------------------|--------------|
| Sample      | Exp. Cells | Lower          | Lower      | Min. UMI            | Max. % Mito. | Total Droplets Included | Chosen alpha |
| 2771_S1     | 2400       | Inflection pt. | 0.17       | 1000                | 40           | NA                      | 0.1          |
| 2771_S2     | 1000       | Inflection pt. | 0.15       | 1000                | 40           | NA                      | 0.1          |
| 2771_S3     | 1300       | Inflection pt. | 0.1        | 1000                | 40           | NA                      | 0.1          |
| 3072_S1     | 1500       | Inflection pt. | 0.19       | 1000                | 40           | NA                      | 0.1          |
| 3072_S2     | 2000       | Inflection pt. | 0.27       | 1000                | 40           | NA                      | 0.1          |
| 3072_S3     | 2000       | Inflection pt. | 0.09       | 1000                | 40           | NA                      | 0.1          |
| 3254_S1     | 1300       | Inflection pt. | 0.09       | 1000                | 40           | NA                      | 0.1          |
| 3777_S1     | 1000       | Inflection pt. | 0.08       | 1000                | 40           | NA                      | 0.5          |
| 3777_S2     | 1200       | Inflection pt. | 0.17       | 1000                | 40           | NA                      | 0.1          |
| 3907_S1     | 2000       | Inflection pt. | 0.1        | 3000                | 40           | NA                      | 0.9          |
| 3907_S2     | 2000       | Inflection pt. | 0.09       | 3000                | 40           | NA                      | 0.1          |
| 4058_colon  | 2000       | Inflection pt. | 0.2        | 10000               | 40           | NA                      | 0.1          |
| MPP_03A     | 900        | Inflection pt. | 0.14       | 5000                | 40           | NA                      | 0.1          |
| MPP_04A     | 700        | Inflection pt. | 0.16       | 5000                | 40           | NA                      | 0.1          |
| MPP_07A     | 1300       | Inflection pt. | 0.21       | 5000                | 40           | NA                      | 0.1          |
| MPP_08A     | 1500       | Inflection pt. | 0.17       | 5000                | 40           | NA                      | 0.1          |
| MPP_13A     | 1600       | Inflection pt. | 0.18       | 5000                | 40           | NA                      | 0.1          |
| MPP_18A     | 700        | Inflection pt. | 0.14       | 5000                | 40           | NA                      | 0.1          |
| MPP_19A     | 1400       | Inflection pt. | 0.22       | 5000                | 40           | NA                      | 0.1          |
| MPP_21A     | 2000       | Inflection pt. | 0.15       | 5000                | 40           | NA                      | 0.1          |
| MPP_48A     | 500        | Inflection pt. | 0.1        | 5000                | 40           | NA                      | 0.1          |
| MPX_03A     | 1100       | Inflection pt. | 0.15       | 5000                | 40           | NA                      | 0.1          |
| MPX_03B     | 800        | Inflection pt. | 0.22       | 5000                | 40           | NA                      | 0.5          |
| MPX_04A     | 900        | Inflection pt. | 0.19       | 5000                | 40           | NA                      | 0.1          |
| MPX_08A     | 1100       | Inflection pt. | 0.24       | 5000                | 40           | NA                      | 0.1          |
| MPX_08B     | 900        | Inflection pt. | 0.2        | 5000                | 40           | NA                      | 0.1          |
| MPX_09A     | 500        | Inflection pt. | 0.2        | 5000                | 40           | NA                      | 0.1          |
| MPX_09B     | 1200       | Inflection pt. | 0.23       | 5000                | 40           | NA                      | 0.1          |
| MPX_17A     | 800        | Inflection pt. | 0.18       | 5000                | 40           | NA                      | 0.1          |
| MPX_19A     | 800        | Inflection pt. | 0.16       | 5000                | 40           | NA                      | 0.1          |
| MPX_19B     | 2700       | Inflection pt. | 0.17       | 5000                | 40           | NA                      | 0.1          |
| MPX_21A     | 1600       | Inflection pt. | 0.17       | 5000                | 40           | NA                      | 0.1          |
| MPX_21B     | 1200       | Inflection pt. | 0.01       | 5000                | 40           | NA                      | 0.1          |
| 293t        | 2800       | Inflection pt. | 0.1        | 10000               | 40           | 15000                   | 0.1          |
| jurkat      | 3200       | Inflection pt. | 0.1        | 10000               | 40           | 15000                   | 0.9          |
| neuron_9k   | 9000       | Inflection pt. | 0.1        | 5000                | 40           | 20000                   | 0.1          |
| neurons_900 | 900        | Inflection pt. | 0.1        | 5000                | 40           | 10000                   | 0.1          |
| pbmc_4k     | 4000       | Inflection pt. | 0.1        | 3000                | 40           | 15000                   | 0.9          |
| t_4k_small  | 4000       | Inflection pt. | 0.1        | 3000                | 40           | 15000                   | 0.5          |
| placenta1   | 5000       | Inflection pt. | 0.1        | 3000                | 40           | 20000                   | 0.1          |
| placenta2   | 5000       | Inflection pt. | 0.1        | 3000                | 40           | 20000                   | 0.1          |
| placenta3   | 5000       | Inflection pt. | 0.1        | 3000                | 40           | 20000                   | 0.9          |
| placenta4   | 5000       | Inflection pt. | 0.1        | 3000                | 40           | 20000                   | 0.9          |
| placenta5   | 5000       | Inflection pt. | 0.1        | 5000                | 40           | 20000                   | 0.75         |
| placenta6   | 5000       | Inflection pt. | 0.1        | 10000               | 40           | 20000                   | 0.1          |
| 3659_colon  | 5000       | Inflection pt. | 0.1        | 10000               | 40           | 20000                   | 0.1          |

Supplementary Table 8. AUC values for dropkick\_label versus CellRanger\_2 for 13 10x Genomics scRNA-seq datasets with “lower\_prop” parameter titrated from 10 to 25 % of total barcodes.

|             | dropkick label<br>total cells | Lower = 0.1<br>total cells | Lower = 0.1<br>AUC | Lower = 0.15<br>total cells | Lower = 0.15<br>AUC | Lower = 0.2<br>total cells | Lower = 0.2<br>AUC | Lower = 0.25<br>total cells | Lower = 0.25<br>AUC |
|-------------|-------------------------------|----------------------------|--------------------|-----------------------------|---------------------|----------------------------|--------------------|-----------------------------|---------------------|
| 293t        | 3224                          | 2897                       | 0.9994             | 2849                        | 0.9993              | 2769                       | 0.9992             | 2635                        | 0.9990              |
| jurkat      | 4020                          | 3259                       | 0.9989             | 3196                        | 0.9988              | 3080                       | 0.9986             | 2907                        | 0.9984              |
| neuron_9k   | 11050                         | 9094                       | 0.9964             | 8043                        | 0.9960              | 6843                       | 0.9952             | 5482                        | 0.9940              |
| neurons_900 | 1297                          | 792                        | 0.9963             | 531                         | 0.9992              | 340                        | 0.9990             | 253                         | 0.9989              |
| pbmc_4k     | 4830                          | 4335                       | 0.9999             | 4018                        | 0.9998              | 3560                       | 0.9995             | 2622                        | 0.9989              |
| t_4k_small  | 4716                          | 4494                       | 0.9998             | 4362                        | 0.9998              | 4224                       | 0.9997             | 3994                        | 0.9996              |
| placenta1   | 6285                          | 5636                       | 0.9999             | 4735                        | 0.9995              | 3752                       | 0.9991             | 3015                        | 0.9988              |
| placenta2   | 2771                          | 2101                       | 0.9997             | 1757                        | 0.9996              | 1486                       | 0.9996             | 1289                        | 0.9995              |
| placenta3   | 5373                          | 4019                       | 0.9997             | 3600                        | 0.9994              | 3075                       | 0.9990             | 2461                        | 0.9985              |
| placenta4   | 5038                          | 3906                       | 0.9996             | 3506                        | 0.9994              | 3040                       | 0.9992             | 2542                        | 0.9990              |
| placenta5   | 4064                          | 2723                       | 0.9994             | 2362                        | 0.9993              | 2041                       | 0.9990             | 1795                        | 0.9988              |
| placenta6   | 3942                          | 3289                       | 0.9998             | 2768                        | 0.9994              | 2258                       | 0.9991             | 1727                        | 0.9988              |
| 3659_colon  | 3376                          | 3063                       | 0.9984             | 2836                        | 0.9978              | 2600                       | 0.9969             | 2203                        | 0.9942              |

Supplementary Table 9. AUC values for dropkick\_label versus CellRanger\_2 for 33 inDrop scRNA-seq datasets with “lower\_prop” parameter titrated from 10 to 25 % of total barcodes.

|            | dropkick label total cells | Lower = 0.1 total cells | Lower = 0.1 AUC | Lower = 0.15 total cells | Lower = 0.15 AUC | Lower = 0.2 total cells | Lower = 0.2 AUC | Lower = 0.25 total cells | Lower = 0.25 AUC |
|------------|----------------------------|-------------------------|-----------------|--------------------------|------------------|-------------------------|-----------------|--------------------------|------------------|
| 2771 S1    | 2222                       | 3442                    | 0.9103          | 2613                     | 0.9241           | 2072                    | 0.9272          | 1648                     | 0.9165           |
| 2771 S2    | 1248                       | 1418                    | 0.9192          | 925                      | 0.9237           | 656                     | 0.9231          | 457                      | 0.9139           |
| 2771 S3    | 1382                       | 2243                    | 0.8792          | 1433                     | 0.9150           | 1072                    | 0.9270          | 835                      | 0.9407           |
| 3072 S1    | 962                        | 1523                    | 0.9619          | 1037                     | 0.9763           | 846                     | 0.9787          | 728                      | 0.9795           |
| 3072 S2    | 2370                       | 5960                    | 0.8171          | 3232                     | 0.8808           | 2120                    | 0.9235          | 1614                     | 0.9431           |
| 3072 S3    | 3112                       | 7970                    | 0.9002          | 5963                     | 0.8649           | 4139                    | 0.9013          | 3131                     | 0.9275           |
| 3254 S1    | 1285                       | 1273                    | 0.9516          | 979                      | 0.9552           | 776                     | 0.9413          | 613                      | 0.9312           |
| 3777 S1    | 1066                       | 800                     | 0.9655          | 629                      | 0.9502           | 478                     | 0.9318          | 354                      | 0.9165           |
| 3777 S2    | 927                        | 989                     | 0.9677          | 731                      | 0.9783           | 582                     | 0.9735          | 460                      | 0.9681           |
| 3907 S1    | 2260                       | 2888                    | 0.9379          | 2147                     | 0.9726           | 1874                    | 0.9831          | 1658                     | 0.9852           |
| 3907 S2    | 1828                       | 2057                    | 0.9652          | 1506                     | 0.9742           | 1194                    | 0.9784          | 994                      | 0.9771           |
| 4058 colon | 2186                       | 2042                    | 0.9787          | 1724                     | 0.9769           | 1381                    | 0.9730          | 1034                     | 0.9664           |
| MPP_03A    | 945                        | 2058                    | 0.7972          | 1352                     | 0.8741           | 997                     | 0.9224          | 770                      | 0.9409           |
| MPP_04A    | 702                        | 912                     | 0.9151          | 734                      | 0.9316           | 593                     | 0.9232          | 483                      | 0.9120           |
| MPP_07A    | 1384                       | 1729                    | 0.9601          | 1363                     | 0.9832           | 1218                    | 0.9852          | 1102                     | 0.9819           |
| MPP_08A    | 1473                       | 4403                    | 0.7994          | 2571                     | 0.8820           | 1742                    | 0.9236          | 1286                     | 0.9422           |
| MPP_13A    | 1815                       | 2869                    | 0.9159          | 1837                     | 0.9532           | 1383                    | 0.9545          | 1076                     | 0.9453           |
| MPP_18A    | 875                        | 1563                    | 0.8420          | 940                      | 0.9237           | 717                     | 0.9654          | 616                      | 0.9739           |
| MPP_19A    | 1503                       | 1483                    | 0.9811          | 1193                     | 0.9806           | 970                     | 0.9737          | 811                      | 0.9671           |
| MPP_21A    | 2149                       | 5868                    | 0.8171          | 3287                     | 0.9153           | 2330                    | 0.9508          | 1793                     | 0.9596           |
| MPP_48A    | 811                        | 456                     | 0.9317          | 303                      | 0.9637           | 227                     | 0.9705          | 165                      | 0.9721           |
| MPX_03A    | 1228                       | 1199                    | 0.9468          | 1075                     | 0.9573           | 964                     | 0.9535          | 846                      | 0.9433           |
| MPX_03B    | 407                        | 761                     | 0.9343          | 568                      | 0.9657           | 506                     | 0.9727          | 447                      | 0.9743           |
| MPX_04A    | 744                        | 4089                    | 0.7892          | 1820                     | 0.8327           | 1114                    | 0.8929          | 800                      | 0.9413           |
| MPX_08A    | 1277                       | 2103                    | 0.9105          | 1333                     | 0.9472           | 1016                    | 0.9648          | 821                      | 0.9680           |
| MPX_08B    | 947                        | 2654                    | 0.8298          | 1484                     | 0.9019           | 1118                    | 0.9540          | 962                      | 0.9751           |
| MPX_09A    | 549                        | 981                     | 0.9169          | 675                      | 0.9494           | 511                     | 0.9620          | 411                      | 0.9638           |
| MPX_09B    | 1462                       | 2187                    | 0.9199          | 1489                     | 0.9674           | 1243                    | 0.9779          | 1092                     | 0.9814           |
| MPX_17A    | 889                        | 2189                    | 0.8975          | 1386                     | 0.9292           | 988                     | 0.9536          | 775                      | 0.9663           |
| MPX_19A    | 857                        | 1562                    | 0.9031          | 1000                     | 0.9470           | 718                     | 0.9702          | 572                      | 0.9785           |
| MPX_19B    | 2830                       | 3251                    | 0.9670          | 2573                     | 0.9684           | 2045                    | 0.9481          | 1570                     | 0.9286           |
| MPX_21A    | 1647                       | 2743                    | 0.9204          | 1978                     | 0.9564           | 1651                    | 0.9697          | 1407                     | 0.9733           |
| MPX_21B    | 1377                       | 2433                    | 0.8975          | 1582                     | 0.9413           | 1207                    | 0.9643          | 1016                     | 0.9678           |

Supplementary Table 10. AUC values for dropkick\_label versus EmptyDrops for 13 10x Genomics scRNA-seq datasets with “lower” parameter titrated between 500 and 2,000 total UMI counts.

|             | dropkick label total cells | Lower = 500 total cells | Lower = 500 AUC | Lower = 1000 total cells | Lower = 1000 AUC | Lower = 1500 total cells | Lower = 1500 AUC | Lower = 2000 total cells | Lower = 2000 AUC |
|-------------|----------------------------|-------------------------|-----------------|--------------------------|------------------|--------------------------|------------------|--------------------------|------------------|
| 293t        | 3224                       | 2299                    | 0.9994          | 2299                     | 0.9994           | 2233                     | 0.9994           | 2233                     | 0.9994           |
| jurkat      | 4020                       | 2565                    | 0.9991          | 2565                     | 0.9991           | 2565                     | 0.9991           | 2565                     | 0.9991           |
| neuron_9k   | 11050                      | 6048                    | 0.9944          | 6053                     | 0.9944           | 6068                     | 0.9944           | 6137                     | 0.9944           |
| neurons_900 | 1297                       | 581                     | 0.9984          | 581                      | 0.9984           | 585                      | 0.9984           | 586                      | 0.9984           |
| pbmc_4k     | 4830                       | 3378                    | 0.9994          | 3325                     | 0.9993           | 3304                     | 0.9993           | 3269                     | 0.9993           |
| t_4k_small  | 4716                       | 3398                    | 0.9996          | 3398                     | 0.9996           | 3398                     | 0.9996           | 3387                     | 0.9996           |
| placenta1   | 6285                       | 4349                    | 0.9994          | 4347                     | 0.9994           | 4334                     | 0.9994           | 4296                     | 0.9993           |
| placenta2   | 2771                       | 601                     | 0.9994          | 601                      | 0.9994           | 601                      | 0.9994           | 601                      | 0.9994           |
| placenta3   | 5373                       | 3232                    | 0.9991          | 3232                     | 0.9991           | 3232                     | 0.9991           | 3232                     | 0.9991           |
| placenta4   | 5038                       | 3214                    | 0.9993          | 3214                     | 0.9993           | 3204                     | 0.9993           | 3126                     | 0.9993           |
| placenta5   | 4064                       | 1019                    | 0.9982          | 1019                     | 0.9982           | 1019                     | 0.9982           | 1019                     | 0.9982           |
| placenta6   | 3942                       | 2115                    | 0.9990          | 2115                     | 0.9990           | 2115                     | 0.9990           | 2114                     | 0.9990           |
| 3659_colon  | 3376                       | 2214                    | 0.9943          | 2214                     | 0.9943           | 2214                     | 0.9943           | 2214                     | 0.9943           |

Supplementary Table 11. AUC values for dropkick\_label versus EmptyDrops for 33 inDrop scRNA-seq datasets with “lower” parameter titrated between 500 and 2,000 total UMI counts.

|            | dropkick label total cells | Lower = 500 total cells | Lower = 500 AUC | Lower = 1000 total cells | Lower = 1000 AUC | Lower = 1500 total cells | Lower = 1500 AUC | Lower = 2000 total cells | Lower = 2000 AUC |
|------------|----------------------------|-------------------------|-----------------|--------------------------|------------------|--------------------------|------------------|--------------------------|------------------|
| 2771 S1    | 2222                       | 4419                    | 0.9137          | 4322                     | 0.9135           | 4093                     | 0.9166           | 3866                     | 0.9274           |
| 2771 S2    | 1248                       | 2507                    | 0.9382          | 2424                     | 0.9311           | 2327                     | 0.9323           | 2198                     | 0.9369           |
| 2771 S3    | 1382                       | 1527                    | 0.9554          | 151                      | 0.9537           | 151                      | 0.9537           | 13                       | 0.9286           |
| 3072 S1    | 962                        | 4537                    | 0.8438          | 6105                     | 0.7668           | 5959                     | 0.7715           | 6359                     | 0.7560           |
| 3072 S2    | 2370                       | 11818                   | 0.8814          | 6726                     | 0.8945           | 7006                     | 0.8858           | 7000                     | 0.8844           |
| 3072 S3    | 3112                       | 8334                    | 0.8842          | 7303                     | 0.8734           | 7291                     | 0.8624           | 5370                     | 0.8548           |
| 3254 S1    | 1285                       | 1667                    | 0.9762          | 2295                     | 0.9174           | 2238                     | 0.9224           | 2092                     | 0.9351           |
| 3777 S1    | 1066                       | 1598                    | 0.9462          | 1613                     | 0.9280           | 1641                     | 0.9148           | 1757                     | 0.9045           |
| 3777 S2    | 927                        | 2140                    | 0.9366          | 2027                     | 0.9411           | 2038                     | 0.9258           | 2441                     | 0.8935           |
| 3907 S1    | 2260                       | 14527                   | 0.7998          | 7491                     | 0.7505           | 11595                    | 0.6960           | 11905                    | 0.6981           |
| 3907 S2    | 1828                       | 12705                   | 0.7290          | 6153                     | 0.6936           | 7132                     | 0.6999           | 7303                     | 0.7007           |
| 4058 colon | 2186                       | 11692                   | 0.8506          | 1298                     | 0.9719           | 2940                     | 0.9683           | 2998                     | 0.9648           |
| MPP_03A    | 945                        | 4841                    | 0.7077          | 1709                     | 0.9557           | 1944                     | 0.9281           | 2073                     | 0.9095           |
| MPP_04A    | 702                        | 1049                    | 0.9366          | 1111                     | 0.9123           | 1116                     | 0.9093           | 1155                     | 0.8918           |
| MPP_07A    | 1384                       | 1965                    | 0.8981          | 2679                     | 0.8647           | 2827                     | 0.8538           | 2887                     | 0.8507           |
| MPP_08A    | 1473                       | 7006                    | 0.7388          | 2923                     | 0.8823           | 3537                     | 0.8565           | 3693                     | 0.8530           |
| MPP_13A    | 1815                       | 6779                    | 0.8102          | 3600                     | 0.9046           | 3796                     | 0.9003           | 3717                     | 0.8997           |
| MPP_18A    | 875                        | 5645                    | 0.7244          | 2266                     | 0.9227           | 2446                     | 0.9060           | 2531                     | 0.9009           |
| MPP_19A    | 1503                       | 2507                    | 0.9332          | 3340                     | 0.8843           | 3349                     | 0.8833           | 3271                     | 0.8883           |
| MPP_21A    | 2149                       | 7098                    | 0.7913          | 7146                     | 0.8064           | 7053                     | 0.8152           | 6708                     | 0.8326           |
| MPP_48A    | 811                        | 1289                    | 0.8747          | 1557                     | 0.8454           | 1840                     | 0.7984           | 1938                     | 0.7852           |
| MPX_03A    | 1228                       | 1820                    | 0.8879          | 1901                     | 0.8739           | 1909                     | 0.8706           | 1942                     | 0.8663           |
| MPX_03B    | 407                        | 1874                    | 0.8532          | 2539                     | 0.7739           | 2613                     | 0.7679           | 2569                     | 0.7705           |
| MPX_04A    | 744                        | 11374                   | 0.7947          | 10713                    | 0.8128           | 3598                     | 0.8835           | 3704                     | 0.8636           |
| MPX_08A    | 1277                       | 6765                    | 0.7626          | 6654                     | 0.7826           | 3117                     | 0.9263           | 3215                     | 0.9190           |
| MPX_08B    | 947                        | 6718                    | 0.8796          | 6841                     | 0.8665           | 2290                     | 0.8498           | 2534                     | 0.8345           |
| MPX_09A    | 549                        | 3543                    | 0.7547          | 1485                     | 0.8908           | 1543                     | 0.8783           | 1489                     | 0.8855           |
| MPX_09B    | 1462                       | 2901                    | 0.9463          | 4964                     | 0.8871           | 5104                     | 0.8783           | 5061                     | 0.8815           |
| MPX_17A    | 889                        | 1775                    | 0.9054          | 4291                     | 0.7568           | 4746                     | 0.7598           | 4812                     | 0.7601           |
| MPX_19A    | 857                        | 6200                    | 0.6804          | 2189                     | 0.8592           | 2863                     | 0.8379           | 2971                     | 0.8388           |
| MPX_19B    | 2830                       | 3468                    | 0.9792          | 4560                     | 0.9296           | 4584                     | 0.9292           | 4468                     | 0.9333           |
| MPX_21A    | 1647                       | 7168                    | 0.7603          | 7258                     | 0.7821           | 3504                     | 0.9489           | 3576                     | 0.9465           |
| MPX_21B    | 1377                       | 5983                    | 0.7933          | 5908                     | 0.8038           | 2525                     | 0.9298           | 2755                     | 0.9167           |

Supplementary Table 12. Code and data resources.

| Resource                    | Source                            | Identifier                                                   |
|-----------------------------|-----------------------------------|--------------------------------------------------------------|
| Deposited Data              |                                   |                                                              |
| 293T Cells                  | Zheng, et al. 2017                | support.10xgenomics.com/single-cell-gene-expression/datasets |
| Jurkat Cells                | Zheng, et al. 2017                |                                                              |
| 9k Neurons                  | 10x Genomics                      |                                                              |
| 900 Neurons                 | 10x Genomics                      |                                                              |
| 4k PBMCs                    | 10x Genomics                      |                                                              |
| 4k Pan-T Cells              | 10x Genomics                      |                                                              |
| Placenta                    | 10x Genomics                      |                                                              |
| 3907_S1 & 3907_S2           | this manuscript                   | GSE158636                                                    |
| Software and Algorithms     |                                   |                                                              |
| Python version 3.8.2        | Python Software Foundation        | python.org                                                   |
| matplotlib version 3.3.0    | Hunter 2007                       | matplotlib.org                                               |
| numpy version 1.19.1        | Oliphant 2006                     | numpy.org                                                    |
| pandas version 1.1.0        | McKinney, et al. 2010             | pandas.pydata.org                                            |
| SCANPY version 1.5.1        | Wolf, et al. 2018                 | pypi.org/project/scanpy/                                     |
| scikit-learn version 0.23.1 | Pedregosa, et al. 2011            | scikit-learn.org                                             |
| scipy version 1.5.2         | Oliphant 2007                     | scipy.org                                                    |
| seaborn version 0.10.1      | Waskom, et al. 2014               | seaborn.pydata.org                                           |
| umap-learn version 0.4.3    | McInnes and Healy 2018            | github.com/lmcinnes/umap                                     |
| R version 3.6.3             | The R Foundation                  | r-project.org                                                |
| Seurat version 3.0.0        | Butler, et al. 2018               | satijalab.org/seurat                                         |
| DropletUtils version 3.11   | Lun, et al. 2019                  | 10.18129/B9.bioc.DropletUtils                                |
| CellBender version 0.2.0    | Fleming, Marioni, and Babadi 2019 | github.com/broadinstitute/CellBender                         |
| UpSetR version 1.4.0        | Lex, et al. 2014                  | doi:10.1109/TVCG.2014.2346248                                |
| sc-UniFrac version 0.9.6    | Liu, et al. 2018                  | github.com/liuqivandy/scUnifrac                              |
| dropkick version 1.2.3      | this manuscript                   | pypi.org/project/dropkick/                                   |
